# Supplementary material for: Indium-catalyzed hydrosilylation of nitroarenes to aromatic amines
Source: Royal Society of Chemistry journal article supplement (doi:10.1039/d4dt02861a), 2024-11-11
Supplement: d4dt02861a1.pdf [file d4dt02861a1.pdf]

*Supporting Information for*

**Indium-Catalyzed Hydrosilylation of Nitroarenes to Aromatic Amines**

Gobbilla Sai Kumar,<sup>a</sup> Kulsum Bano,<sup>a</sup> Priyabrata Biswal,<sup>b</sup> Soumyadip Dey,<sup>a</sup> Ravi Kumar,<sup>a</sup>  
Abhijit Sau,<sup>\*a</sup> Vadapalli Chandrasekhar,<sup>\*b</sup> and Tarun K. Panda<sup>\*a</sup>

<sup>a</sup>Department of Chemistry, Indian Institute of Technology Hyderabad, 502284, Telangana, India.

<sup>b</sup>Tata Institute of Fundamental Research Hyderabad, Gopanpally, 500107, Hyderabad, India.

## Table of Contents

|           |                                                                       |                |
|-----------|-----------------------------------------------------------------------|----------------|
| <b>1.</b> | <b>X-ray crystallographic analysis</b>                                | <b>S3</b>      |
| <b>2.</b> | <b>Crystallographic data and refinement parameters of 1, 2 and 3.</b> | <b>S4</b>      |
| <b>3.</b> | <b>NMR spectra of metal complexes 1, 2 and 3</b>                      | <b>S5-S8</b>   |
| <b>4.</b> | <b>Nitro compounds used in this study</b>                             | <b>S8</b>      |
| <b>5.</b> | <b>NMR data for anilines</b>                                          | <b>S9-S12</b>  |
| <b>6.</b> | <b>NMR spectra of compounds 5a-5y</b>                                 | <b>S13-S37</b> |
| <b>7.</b> | <b>Gram scale reactions</b>                                           | <b>S38</b>     |
| <b>8.</b> | <b>Synthesis of drug molecules 5y-5za and their NMR spectra</b>       | <b>S38-S41</b> |
| <b>9.</b> | <b>References</b>                                                     | <b>S42</b>     |

## 1. X-ray crystallographic analysis.

Single crystals of metal complexes **1**, **2**, and **3** were grown from a concentrated solution of THF/pentane at room temperature. A crystal of suitable dimensions of complexes **1**, **2**, and **3** was mounted on a CryoLoop (Hampton Research Corp.) with a layer of light mineral oil. All the crystals **1**, **2**, and **3** were measured at 293 K. All measurements were made on a Bruker Apex-IV Photon II detector (0.71073 Å) radiation. Crystal data and structure refinement parameters of complexes **1**, **2**, and **3** are summarized in Table S1. The structures were solved by direct methods (SIR2004<sup>1</sup> and refined on  $F^2$  by full-matrix least-squares methods, using SHELXL-2016/6.<sup>2</sup> Non-hydrogen atoms were anisotropically refined. H-atoms were included in the refinement on calculated positions riding on their carrier atoms. The function minimized was  $[\sum w(F_o^2 - F_c^2)^2]$  ( $w = 1 / [\sigma^2(F_o^2) + (aP)^2 + bP]$ ), where  $P = (\text{Max}(F_o^2, 0) + 2F_c^2) / 3$  with  $\sigma^2(F_o^2)$  from counting statistics. The function  $R_1$  and  $wR_2$  were  $(\sum ||F_o| - |F_c||) / \sum |F_o|$  and  $[\sum w(F_o^2 - F_c^2)^2 / \sum (wF_o^4)]^{1/2}$ , respectively. The ORTEP-3 program was used to draw the molecules of **1**, **2**, and **3**. Crystallographic data (excluding structure factors) for the structures reported in this paper have been deposited with the Cambridge Crystallographic Data Centre as supplementary publication no. CCDC 2374056 (**1**), 2374055 (**2**) and 2374057 (**3**). Copies of the data can be obtained free of charge on application to CCDC, 12 Union Road, Cambridge CB21EZ, UK (fax: + (44)1223-336-033; email: [deposit@ccdc.cam.ac.uk](mailto:deposit@ccdc.cam.ac.uk)).

**2. Table S1.** Crystallographic data and refinement parameters of **1**, **2** and **3**.

| Crystal Parameters                    | <b>1</b>                                                             | <b>2</b>                                                           | <b>3</b>                                                          |
|---------------------------------------|----------------------------------------------------------------------|--------------------------------------------------------------------|-------------------------------------------------------------------|
| CCDC No.                              | 2374056                                                              | 2374055                                                            | 2374057                                                           |
| Empirical Formula                     | C <sub>18</sub> H <sub>22</sub> Cl <sub>2</sub> InN <sub>2</sub> OPS | C <sub>23</sub> H <sub>24</sub> Cl <sub>3</sub> InN <sub>2</sub> O | C <sub>22</sub> H <sub>32</sub> ClInN <sub>6</sub> O <sub>2</sub> |
| Formula weight                        | 531.12                                                               | 565.61                                                             | 562.80                                                            |
| T (K)                                 | 273(2) K                                                             | 273(2) K                                                           | 273(2) K                                                          |
| $\lambda$ (Å)                         | 0.71073 Å                                                            | 0.71073 Å                                                          | 0.71073 Å                                                         |
| Crystal System                        | Monoclinic                                                           | Triclinic                                                          | Monoclinic                                                        |
| Space group                           | Cc                                                                   | <i>P</i> -1                                                        | <i>P</i> 2 <sub>1</sub> /c                                        |
| a (Å)                                 | 21.0292(11)                                                          | 8.8110(3)                                                          | 18.309(2)                                                         |
| b (Å)                                 | 7.9555(4)                                                            | 14.1384(5)                                                         | 9.8212(9)                                                         |
| c (Å)                                 | 14.0135(6)                                                           | 19.8289(6)                                                         | 15.5256(14)                                                       |
| $\alpha$ (°)                          | 90                                                                   | 80.3650(10)                                                        | 90                                                                |
| $\beta$ (°)                           | 112.329(2)                                                           | 87.6050(10)                                                        | 115.026(3)                                                        |
| $\gamma$ (°)                          | 90                                                                   | 82.2660(10)                                                        | 90                                                                |
| V (Å <sup>3</sup> )                   | 2168.64(18)                                                          | 2412.69(14)                                                        | 2529.7                                                            |
| Z                                     | 4                                                                    | 4                                                                  | 4                                                                 |
| $D_{cal}$ g cm <sup>-3</sup>          | 1.627                                                                | 1.557                                                              | 1.478                                                             |
| $\mu$ (mm <sup>-1</sup> )             | 1.516                                                                | 1.329                                                              | 1.069                                                             |
| $F(000)$                              | 1064                                                                 | 1136                                                               | 1152                                                              |
| Theta range for                       | 2.979 to 27.169                                                      | 2.084 to 27.110                                                    | 2.410 to 27.163                                                   |
| 2Data collection                      | Deg.                                                                 | Deg.                                                               | Deg.                                                              |
| Limiting indices                      | -26 ≤ h ≤ 26                                                         | -11 ≤ h ≤ 10,                                                      | -23 ≤ h ≤ 23                                                      |
|                                       | -9 ≤ k ≤ 10                                                          | -18 ≤ k ≤ 17,                                                      | -12 ≤ k ≤ 12                                                      |
|                                       | -17 ≤ l ≤ 17                                                         | -25 ≤ l ≤ 25                                                       | -19 ≤ l ≤ 19                                                      |
| Reflections                           | 19543/4746                                                           | 48585/10647                                                        | 76971/5619                                                        |
| Collected/unique                      | [R(int) = 0.0517]                                                    | [R(int) = 0.0439]                                                  | [R(int) = 0.0749]                                                 |
| Completeness to theta                 | 99.6 %                                                               | 99.9 %                                                             | 100 %                                                             |
| Absorption correction                 | Multi-scan                                                           | Multi-scan                                                         | Multi-scan                                                        |
| Refinement method                     | Full-matrix                                                          | Full-matrix                                                        | Full-matrix                                                       |
|                                       | least-squares on F <sup>2</sup>                                      | least-squares on F <sup>2</sup>                                    | least-squares on F <sup>2</sup>                                   |
| Data/ restraints/<br>parameters       | 4746 / 2 / 236                                                       | 10647 / 0 / 541                                                    | 5619 / 0 / 289                                                    |
| Goodness-of-fit on F <sup>2</sup>     | 1.016                                                                | 1.020                                                              | 1.019                                                             |
| Final R indices<br>[I>2 $\sigma$ (I)] | R <sub>1</sub> = 0.0289, wR <sub>2</sub> =<br>0.0677                 | R <sub>1</sub> = 0.0374, wR <sub>2</sub> =<br>0.0837               | R <sub>1</sub> = 0.0309, wR <sub>2</sub> =<br>0.0611              |
| R indices (all data)                  | R <sub>1</sub> = 0.0320, wR <sub>2</sub> =<br>0.0688                 | R <sub>1</sub> = 0.0757, wR <sub>2</sub> =<br>0.0968               | R <sub>1</sub> = 0.0536, wR <sub>2</sub> =<br>0.0676              |
| Absolute structure<br>parameter       | 0.819 and -0.723                                                     | 0.644 and<br>-0.526                                                | 0.444 and -0.377                                                  |

### 3. NMR spectra of metal complexes

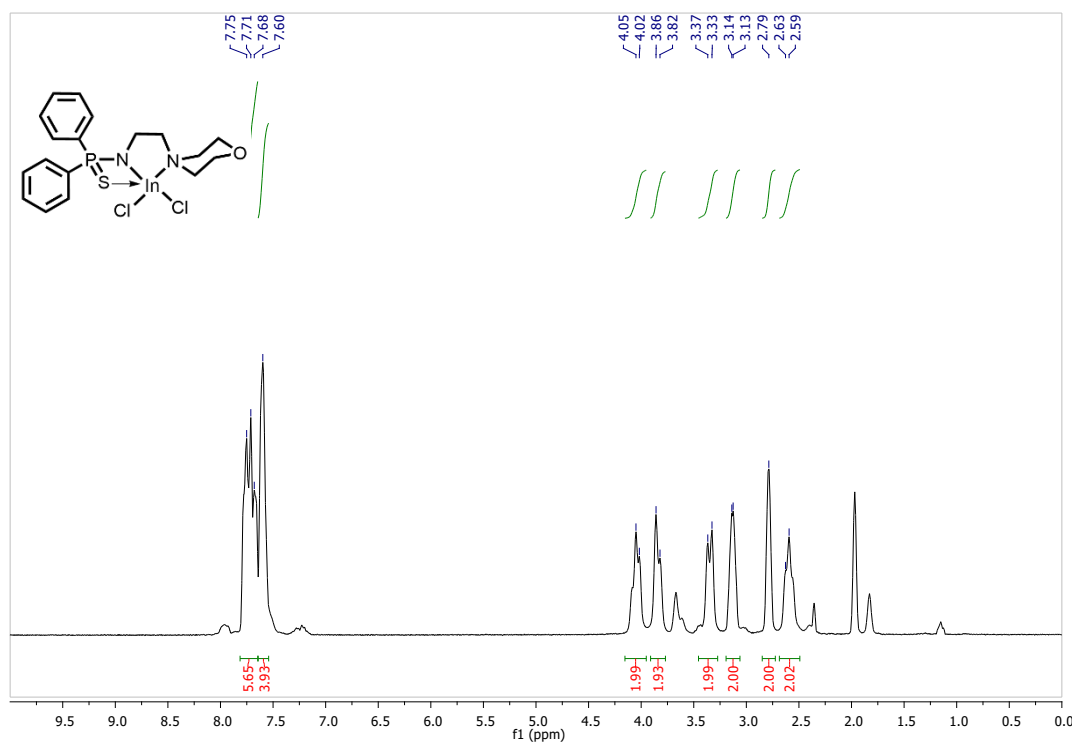

**Figure S1.**  $^1\text{H}$  NMR Spectrum (300 MHz, 25 °C,  $\text{CD}_3\text{CN}$ ) of indium metal complex 1. THF-solvent peaks at 3.60 and 1.84 ppm.  $\text{CD}_3\text{CN}$  peak at 1.94 ppm.

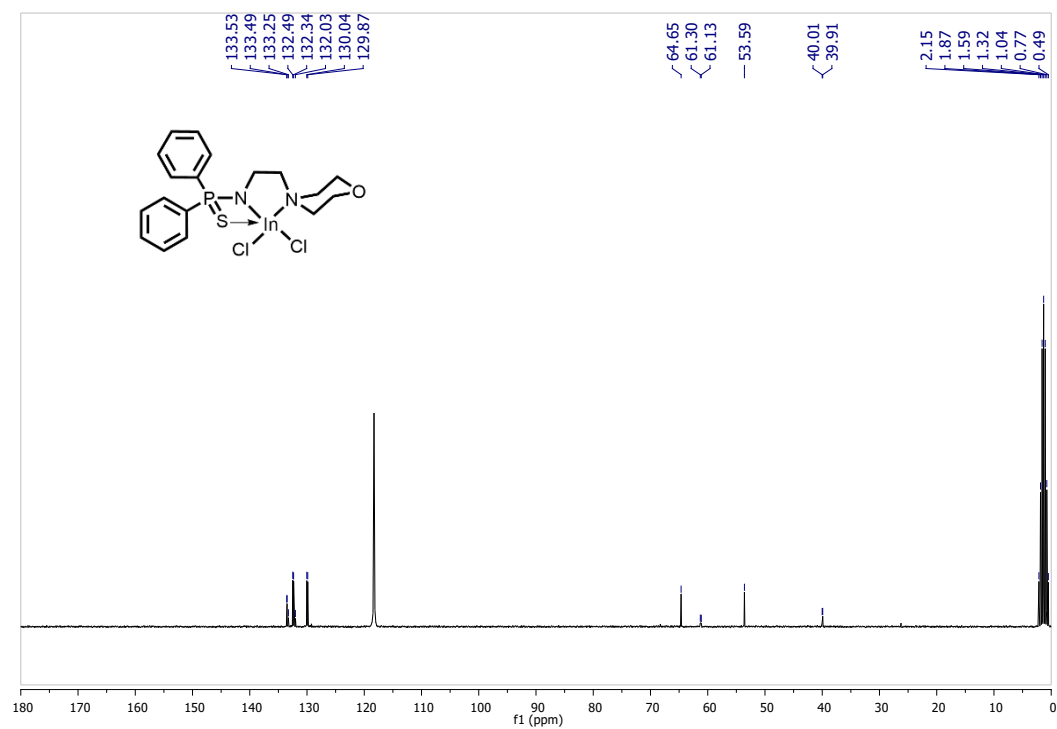

**Figure S2.**  $^{13}\text{C}\{^1\text{H}\}$  NMR (75 MHz, 25 °C,  $\text{CD}_3\text{CN}$ ) of indium metal complex 1. THF-solvent peaks at 64.6, 26.3 ppm.  $\text{CD}_3\text{CN}$  peak at 118.26 and 1.32 ppm.

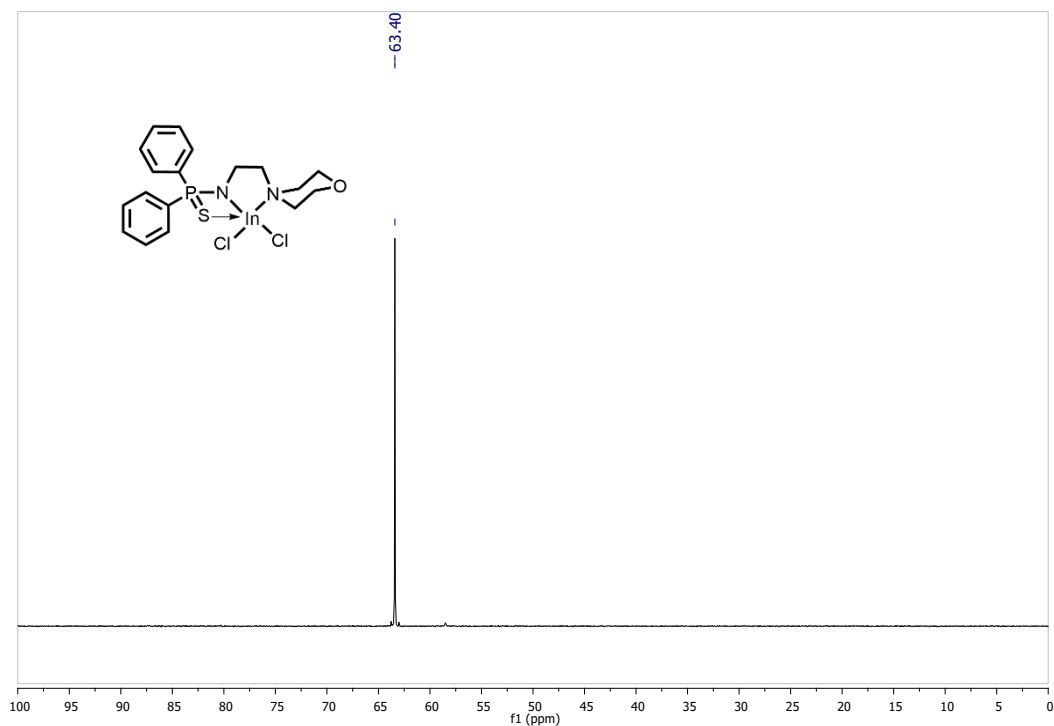

**Figure S3.**  $^{31}\text{P}\{^1\text{H}\}$  NMR (121.5 MHz, 25 °C,  $\text{CD}_3\text{CN}$ ) of indium metal complex **1**.

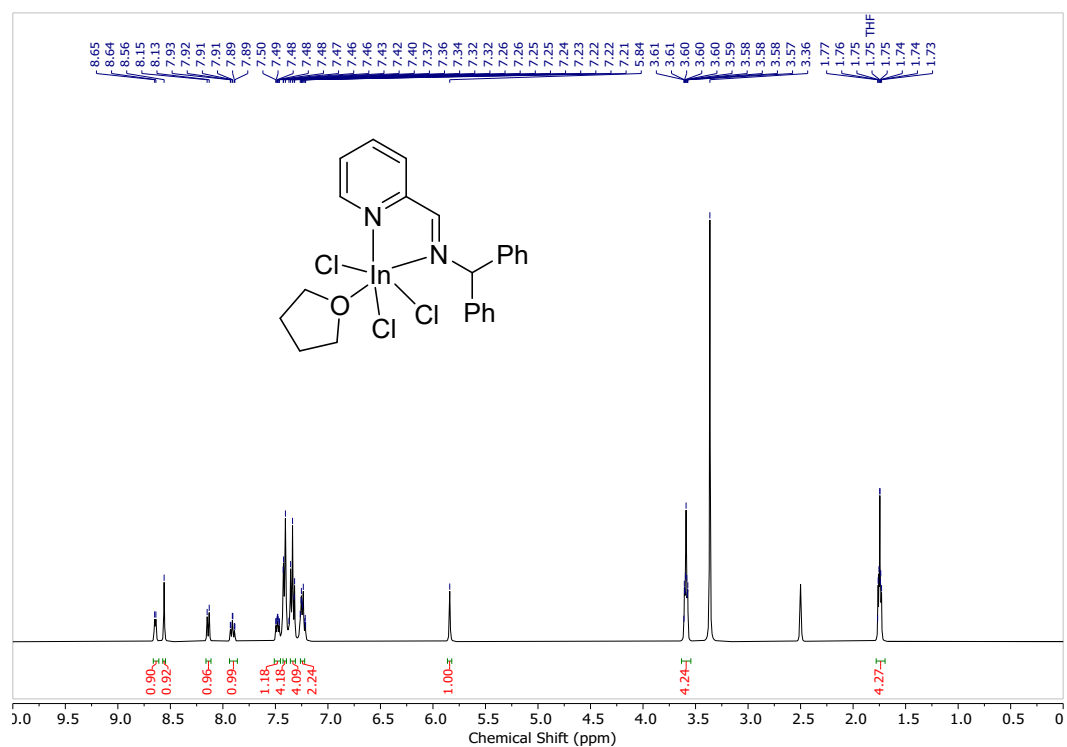

**Figure S4.**  $^1\text{H}$  NMR spectrum (400 MHz, 25 °C,  $\text{DMSO-d}_6$ ) of indium metal complex **2**. THF-solvent peak at 3.60 and 1.75 ppm.  $\text{DMSO-d}_6$  at 2.50 ppm,  $\text{H}_2\text{O}$  peak at 3.33 ppm.

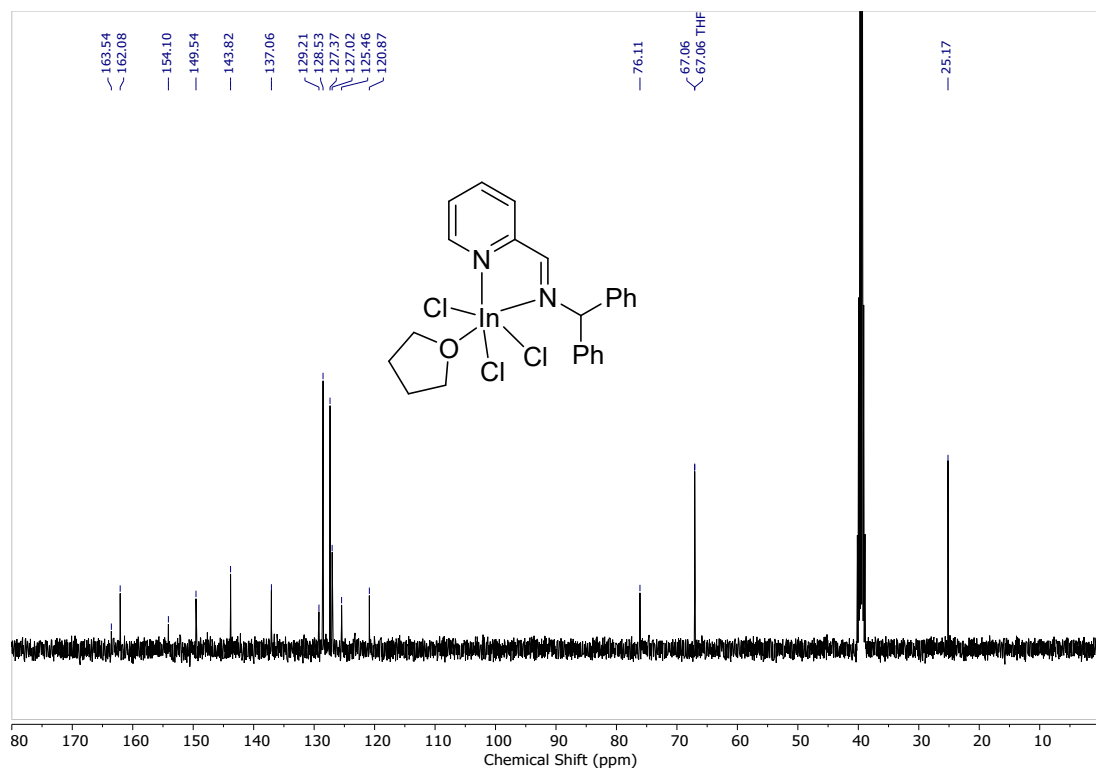

**Figure S5.**  $^{13}\text{C}\{^1\text{H}\}$  NMR spectrum (100 MHz, 25 °C,  $\text{DMSO-d}_6$ ) of indium metal complex **2**. THF-solvent peak at 67.1 and 25.2 ppm.  $\text{DMSO-d}_6$  at 39.52 ppm.

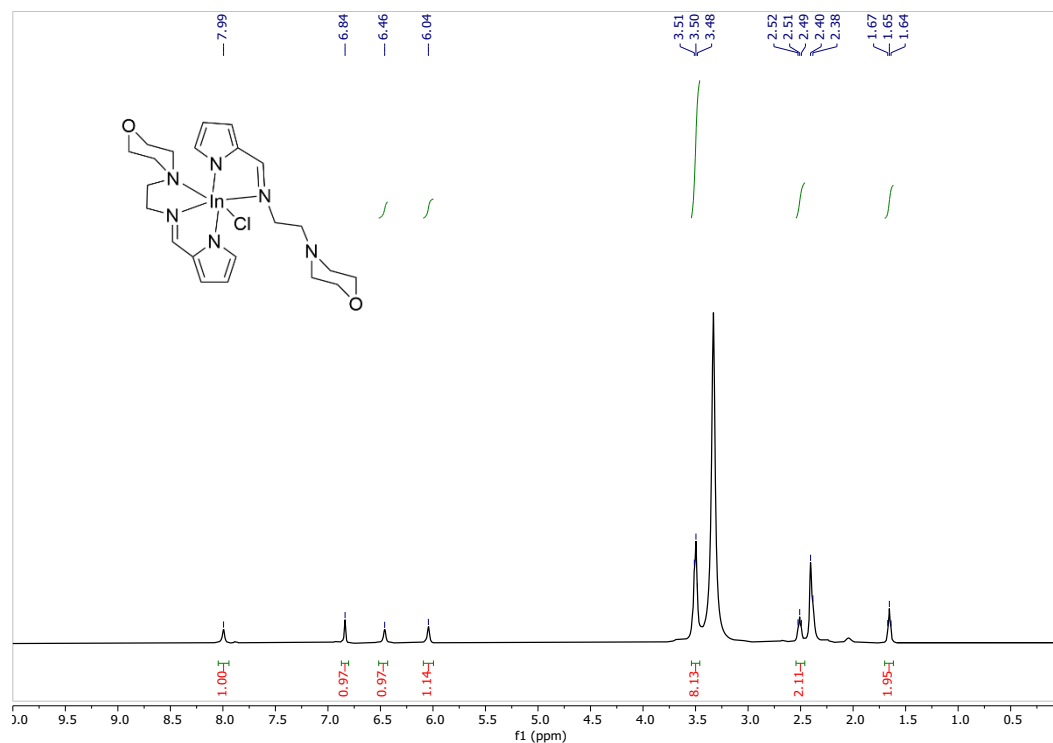

**Figure S6.**  $^1\text{H}$  NMR (400 MHz, 25 °C,  $\text{DMSO-d}_6$ ) of indium metal complex **3**.  $\text{DMSO-d}_6$  at 2.50 ppm,  $\text{H}_2\text{O}$  peak at 3.33 ppm.

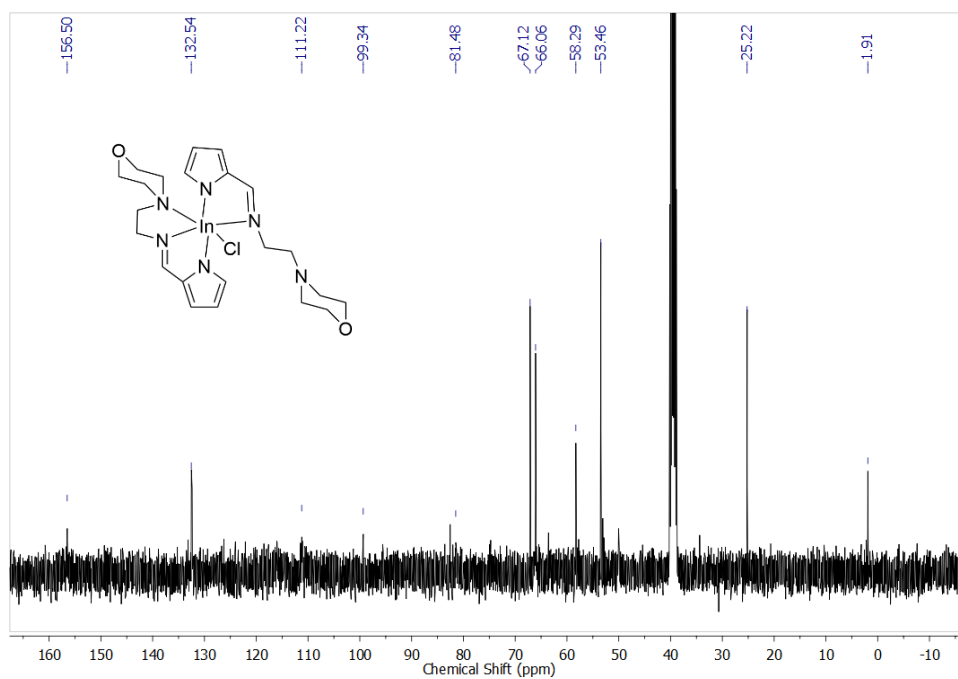

**Figure S7.**  $^{13}\text{C}\{^1\text{H}\}$  NMR (75 MHz, 25 °C, DMSO- $\text{d}_6$ ) of indium metal complex **3**. DMSO- $\text{d}_6$  at 39.5 ppm

#### 4. Nitro compounds used in this study



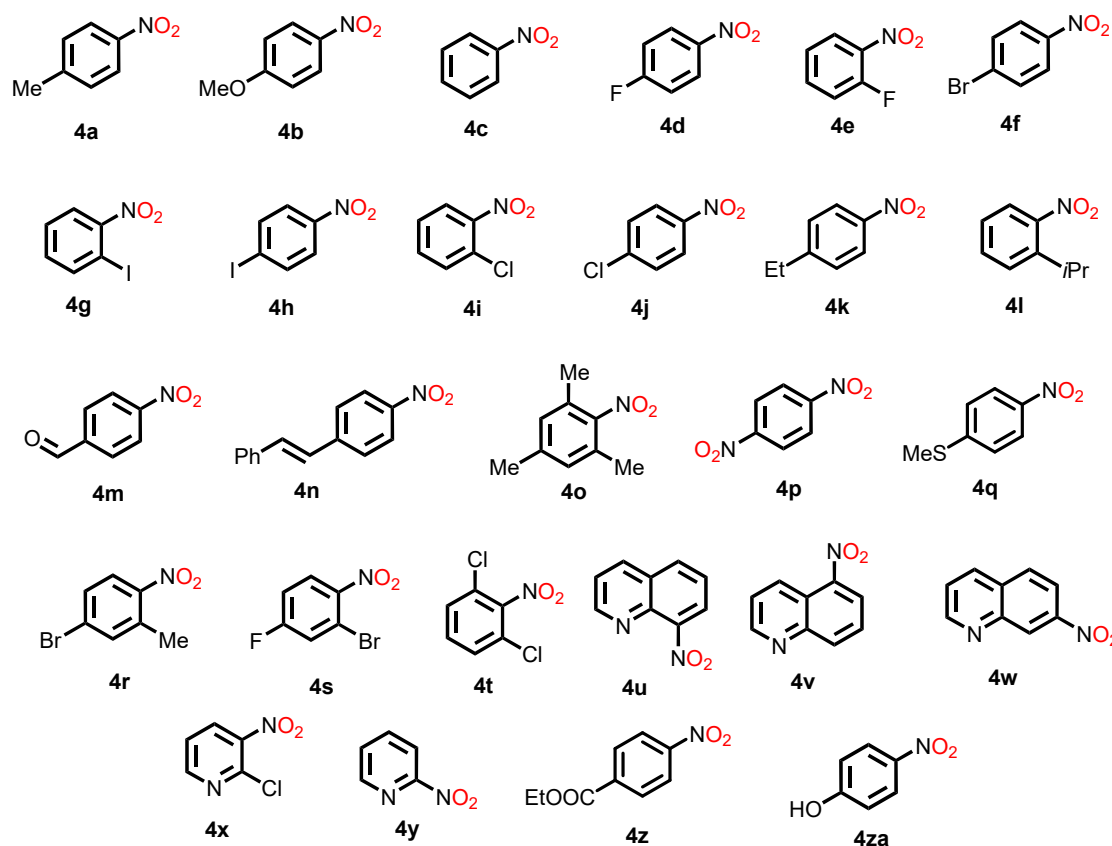

## 5. NMR data for anilines

### General procedure for the reduction of nitroarenes

In a 25 mL Schlenk flask, indium metal complex **1** (5 mol%), nitroarene (0.5 mmol), NaI (10 mol%), and PhSiH<sub>3</sub> (1.0 mmol) were added inside glovebox. Then, toluene (0.5 mL) was added to it, and added to the reaction mixture to stir at 100 °C (preheated) for 12 h. The reaction mixture was allowed to come at room temperature and methanol/water was added to it. The reaction mixture was extracted in DCM and the organic layer was separated which was dried over anhydrous Na<sub>2</sub>SO<sub>4</sub>. The solvent was evaporated and the reaction mixture was purified by column chromatography using silica and a mixture of hexane and ethyl acetate as an eluent. The obtained products were characterized by using NMR spectroscopy.

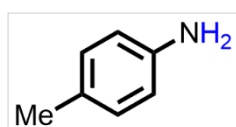

*p*-Toluidine, **5a**.<sup>3</sup> Yield: 88% (44 mg). <sup>1</sup>H NMR (300 MHz, CDCl<sub>3</sub>) δ<sub>H</sub> 6.89 (m, 2H), 6.54 (m, 2H), 3.45 (b, 3H), 2.16 (s, 3H). <sup>13</sup>C{<sup>1</sup>H} NMR (75 MHz, CDCl<sub>3</sub>) δ<sub>C</sub> 143.9, 129.8, 127.8, 115.3, 20.5 ppm.

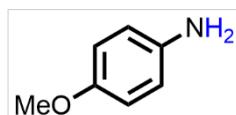

*p*-Anisidine, **5b**.<sup>3</sup> Yield: 88% (54 mg). <sup>1</sup>H NMR (300 MHz, CDCl<sub>3</sub>) δ<sub>H</sub> 6.75 - 6.73 (d, 2H, *J* = 6 Hz), 6.65 - 6.63 (d, 2H, *J* = 6 Hz), 3.74 (s, 3H),

3.41 (b, 2H).  $^{13}\text{C}\{^1\text{H}\}$  NMR (75 MHz,  $\text{CDCl}_3$ )  $\delta_{\text{C}}$  152.9, 140.1, 116.5, 114.9, 55.9 ppm.

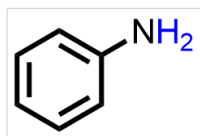

Aniline, **5c**.<sup>3</sup> Yield: 89% (41 mg).  $^1\text{H}$  NMR (300 MHz,  $\text{CDCl}_3$ )  $\delta_{\text{H}}$  7.13 - 7.10 (m, 2H), 6.74 - 6.71 (m, 1H), 6.61 - 6.59 (m, 2H), 3.54 (b, 2H).  $^{13}\text{C}\{^1\text{H}\}$  NMR (75 MHz,  $\text{CDCl}_3$ )  $\delta_{\text{C}}$  146.4, 129.2, 118.4, 115.1 ppm.

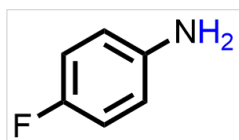

*p*-Fluoroaniline, **5d**.<sup>3</sup> Yield: 76% (42 mg).  $^1\text{H}$  NMR (400 MHz,  $\text{CDCl}_3$ )  $\delta_{\text{H}}$  6.89 - 6.83 (m, 2H), 6.64 - 6.59 (m, 2H), 3.34 (b, 2H).  $^{13}\text{C}\{^1\text{H}\}$  NMR (100 MHz,  $\text{CDCl}_3$ )  $\delta_{\text{C}}$  157.7, 155.3, 142.5 (d,  $J = 2$  Hz), 116.2 (d,  $J = 7$  Hz),

115.9, 115.6 ppm.

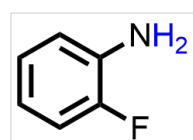

*o*-Fluoroaniline, **5e**.<sup>3</sup> Yield: 78% (43 mg).  $^1\text{H}$  NMR (300 MHz,  $\text{CDCl}_3$ )  $\delta_{\text{H}}$  7.00 - 6.90 (m, 2H), 6.79 - 6.68 (m, 2H), 3.70 (b, 2H).  $^{13}\text{C}\{^1\text{H}\}$  NMR (75 MHz,  $\text{CDCl}_3$ )  $\delta_{\text{C}}$  153.2, 150.0, 134.5 (d,  $J = 12.75$  Hz), 124.4 (d,  $J = 3.75$  Hz),

118.4 (d,  $J = 6.0$  Hz), 116.9, 115.1, 114.9 ppm.

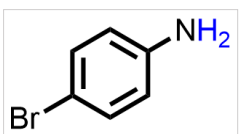

*p*-Bromoaniline, **5f**.<sup>3</sup> Yield: 83% (71 mg).  $^1\text{H}$  NMR (300 MHz,  $\text{CDCl}_3$ )  $\delta_{\text{H}}$  7.25 - 7.22 (m, 2H), 6.56 (d, 2H,  $J = 6$  Hz), 3.41 (b, 2H).  $^{13}\text{C}\{^1\text{H}\}$  NMR (75 MHz,  $\text{CDCl}_3$ )  $\delta_{\text{C}}$  145.51, 132.14, 116.85, 110.36 ppm.

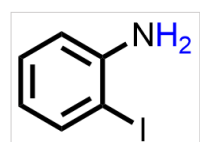

*o*-Iodoaniline, **5g**.<sup>3</sup> Yield: 78% (85 mg).  $^1\text{H}$  NMR (300 MHz,  $\text{CDCl}_3$ )  $\delta_{\text{H}}$  7.64 - 7.62 (m, 1H), 7.13 - 7.11 (m, 1H), 6.75 - 6.73 (m, 1H), 6.47 - 6.44 (m, 1H), 4.07 (b, 2H).  $^{13}\text{C}\{^1\text{H}\}$  NMR (75 MHz,  $\text{CDCl}_3$ )  $\delta_{\text{C}}$  146.9, 139.1, 129.5, 120.1,

114.8, 84.3 ppm.

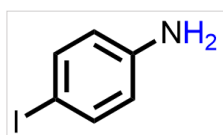

*p*-Iodoaniline, **5h**.<sup>3</sup> Yield: 86% (94 mg).  $^1\text{H}$  NMR (400 MHz,  $\text{CDCl}_3$ )  $\delta_{\text{H}}$  7.42 - 7.40 (m, 2H), 6.48 - 6.45 (m, 2H).  $^{13}\text{C}\{^1\text{H}\}$  NMR (100 MHz,  $\text{CDCl}_3$ )  $\delta_{\text{C}}$  146.1, 137.9, 117.4, 79.4 ppm.

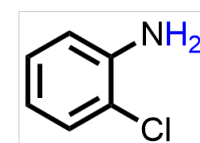

*o*-Chloroaniline, **5i**.<sup>3</sup> Yield: 82% (52 mg).  $^1\text{H}$  NMR (300 MHz,  $\text{CDCl}_3$ ):  $\delta_{\text{H}}$  7.21 - 7.19 (m, 1H), 7.01 - 6.99 (m, 1H), 6.66 - 6.62 (m, 2H), 3.97 (b, 2H).  $^{13}\text{C}\{^1\text{H}\}$  NMR (75 MHz,  $\text{CDCl}_3$ )  $\delta_{\text{C}}$  142.9, 129.4, 127.6, 119.2, 118.9, 115.9

ppm.

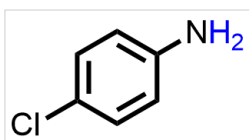

*p*-Chloroaniline, **5j**.<sup>3</sup> Yield: 85% (54 mg). <sup>1</sup>H NMR (300 MHz, CDCl<sub>3</sub>): δ<sub>H</sub> 7.10 - 7.07 (d, 2H, *J* = 9 Hz), 6.60 - 6.57 (d, 2H, *J* = 9 Hz), 3.64 (b, 2H). <sup>13</sup>C{<sup>1</sup>H} NMR (75 MHz, CDCl<sub>3</sub>) δ<sub>C</sub> 145.1, 129.2, 123.2, 116.3 ppm.

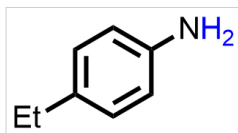

*p*-Ethylaniline, **5k**.<sup>3</sup> Yield: 75% (45 mg). <sup>1</sup>H NMR (400 MHz, CDCl<sub>3</sub>): δ<sub>H</sub> 7.07 (d, *J* = 8 Hz, 2H), 6.69 (d, *J* = 8 Hz, 2H), 3.52 (b, 2H), 2.62 (q, *J* = 8 Hz, 2H), 1.25 (t, *J* = 8 Hz, 3H). <sup>13</sup>C{<sup>1</sup>H} NMR (100 MHz, CDCl<sub>3</sub>) δ<sub>C</sub>

144.1, 134.5, 128.6, 115.3, 28.0, 16.0 ppm.

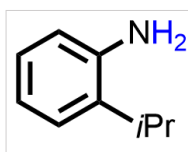

2-Isopropylaniline, **5l**.<sup>3</sup> Yield: 84% (57 mg). δ<sub>H</sub> 7.14 - 7.12 (m, 1H), 7.01 (m, 1H), 6.78 (m, 1H), 6.67 - 6.65 (m, 1H), 3.62 (b, 2H), 2.90 - 2.87 (m, 1H), 1.25 (d, 6H, *J* = 6 Hz). <sup>13</sup>C{<sup>1</sup>H} NMR (75 MHz, CDCl<sub>3</sub>) δ<sub>C</sub> 143.4, 132.7, 126.6,

125.5, 119.1, 115.9, 22.7, 22.4 ppm.

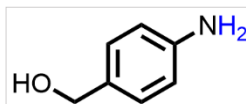

(4-Aminophenyl)methanol, **5m**.<sup>3</sup> Yield: 78% (48 mg). <sup>1</sup>H NMR (300 MHz, CDCl<sub>3</sub>): δ<sub>H</sub> 7.13 - 7.12 (m, 2H), 6.67 - 6.65 (m, 2H), 4.52 (s, 2H), 3.53 (b, 2H). <sup>13</sup>C{<sup>1</sup>H} NMR (75 MHz, CDCl<sub>3</sub>) δ<sub>C</sub> 146.1, 131.2, 128.8, 115.2, 65.3 ppm.

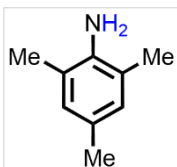

2,4,6-trimethylaniline, **5n**.<sup>3</sup> Yield: 82% (54 mg). <sup>1</sup>H NMR (300 MHz, CDCl<sub>3</sub>): δ<sub>H</sub> 6.74 (m, 2H), 3.39 (s, 2H), 2.19 (s, 3H), 2.12 (s, 6H). <sup>13</sup>C{<sup>1</sup>H} NMR (75 MHz, CDCl<sub>3</sub>) δ<sub>C</sub> 140.1, 128.9, 127.1, 121.8, 20.4, 17.6 ppm.

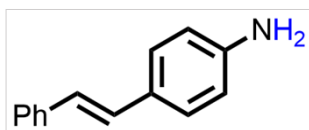

4-[(*E*)-2-Phenylethenyl]aniline, **5o**.<sup>3</sup> Yield: 80% (80 mg). <sup>1</sup>H NMR (300 MHz, CDCl<sub>3</sub>): δ<sub>H</sub> 7.46 (m, 2H), 7.32 - 7.21 (m, 4H), 7.24 - 7.21 (m, 1H), 7.06 - 6.89 (m, 2H), 6.87 (d, 2H, *J* = 6 Hz), 3.71 (b, 2H).

1.26 (Hexane-solvent). <sup>13</sup>C{<sup>1</sup>H} NMR (75 MHz, CDCl<sub>3</sub>) δ<sub>C</sub> 146.3, 138.1, 128.8, 128.7, 128.2, 127.9, 127.0, 126.2, 125.2, 115.3 ppm.

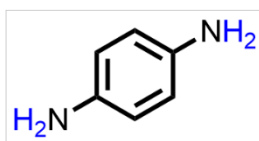

Benzene-1,4-diamine, **5p**.<sup>3</sup> Yield: 71% (38 mg). <sup>1</sup>H NMR (400 MHz, CDCl<sub>3</sub>): δ<sub>H</sub> 6.57 (m, 4H), 3.33 (b, 4H). <sup>13</sup>C{<sup>1</sup>H} NMR (100 MHz, CDCl<sub>3</sub>) δ<sub>C</sub> 138.7, 116.9 ppm.

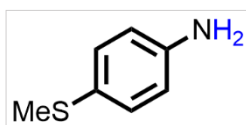

4-(Methylthio)aniline, **5q**.<sup>3</sup> Yield: 78% (54 mg). <sup>1</sup>H NMR (300 MHz, CDCl<sub>3</sub>): δ<sub>H</sub> 7.11 (m, 2H), 6.56 (m, 2H), 3.60 (b, 2H), 2.34 (s, 3H). <sup>13</sup>C{<sup>1</sup>H} NMR (75 MHz, CDCl<sub>3</sub>) δ<sub>C</sub> 145.1, 131.1, 125.8, 115.8, 18.8 ppm.

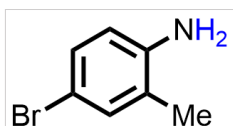

2-Methyl-4-bromoaniline, **5r**.<sup>3</sup> Yield: 85% (78 mg). <sup>1</sup>H NMR (300 MHz, CDCl<sub>3</sub>): δ<sub>H</sub> 7.15 - 7.09 (m, 2H), 6.54 - 6.51 (m, 1H), 3.58 (b, 2H), 2.11 (s, 3H). <sup>13</sup>C{<sup>1</sup>H} NMR (75 MHz, CDCl<sub>3</sub>) δ<sub>C</sub> 143.7, 132.9, 129.7, 124.5, 116.5,

110.2, 17.3 ppm.

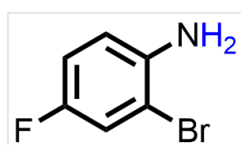

2-Methyl-4-bromoaniline, **5s**.<sup>3</sup> Yield: 78% (74 mg). <sup>1</sup>H NMR (300 MHz, CDCl<sub>3</sub>): δ<sub>H</sub> 7.18 - 7.17 (m, 1H), 6.89 - 6.83 (m, 1H), 6.73 - 6.71 (m, 1H), 3.92 (b, 2H). <sup>13</sup>C{<sup>1</sup>H} NMR (75 MHz, CDCl<sub>3</sub>) δ<sub>C</sub> 156.9, 153.7, 140.7,

119.3, 119.0, 116.0, 116.0 (d, *J* = 7.5 Hz), 115.4, 115.1, 108.6 (d, *J* = 9.75 Hz) ppm.

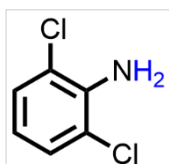

2,6-Dichloroaniline, **5t**.<sup>3</sup> Yield: 80% (64 mg). <sup>1</sup>H NMR (300 MHz, CDCl<sub>3</sub>): δ<sub>H</sub> 7.18 - 7.15 (m, 2H), 6.63 - 6.58 (m, 1H), 4.44 (b, 2H). <sup>13</sup>C{<sup>1</sup>H} NMR (75 MHz, CDCl<sub>3</sub>) δ<sub>C</sub> 140.2, 127.9, 119.8, 118.2 ppm.

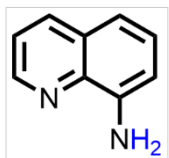

Quinoline-8-amine, **5u**.<sup>3</sup> Yield: 80% (58 mg). <sup>1</sup>H NMR (400 MHz, CDCl<sub>3</sub>): δ<sub>H</sub> 8.76 - 8.75 (m, 1H), 8.06 - 8.04 (m, 1H), 7.36 - 7.31 (m, 2H), 7.15 - 7.13 (m, 1H), 6.93 - 6.91 (m, 1H), 4.99 (b, 2H). <sup>13</sup>C{<sup>1</sup>H} NMR (100 MHz, CDCl<sub>3</sub>) δ<sub>C</sub> 147.5, 144.1, 138.5, 136.1, 128.9, 127.5, 121.5, 116.1, 110.1 ppm.

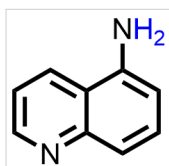

Quinoline-5-amine, **5v**.<sup>3</sup> Yield: 78% (56 mg). <sup>1</sup>H NMR (300 MHz, CDCl<sub>3</sub>): δ<sub>H</sub> 8.78 (b, 1H), 8.08 (b, 1H), 7.42 (b, 3H), 7.23 - 7.22 (b, 1H), 6.71 (b, 1H), 4.04 (b, 2H). <sup>13</sup>C{<sup>1</sup>H} NMR (75 MHz, CDCl<sub>3</sub>) δ<sub>C</sub> 150.3, 149.2, 142.5, 130.1, 129.7, 120.1, 119.7, 118.8, 110.1 ppm.

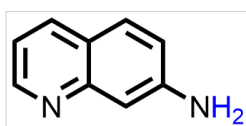

Quinoline-7-amine, **5w**.<sup>3</sup> Yield: 70% (50 mg). <sup>1</sup>H NMR (300 MHz, CDCl<sub>3</sub>): δ<sub>H</sub> 8.73 (b, 1H), 7.95 (b, 1H), 7.58 - 7.57 (b, 1H), 7.23 (b, 1H), 7.11 (b, 1H), 6.97 (b, 1H), 4.23 (b, 2H). <sup>13</sup>C{<sup>1</sup>H} NMR (75 MHz, CDCl<sub>3</sub>) δ<sub>C</sub> 150.6, 149.9, 147.9, 135.8, 128.9, 122.3, 118.8, 117.7, 108.9 ppm.

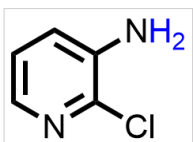

2-Chloropyridin-3-amine, **5x**.<sup>3</sup> Yield: 75% (48 mg). <sup>1</sup>H NMR (300 MHz, CDCl<sub>3</sub>): δ<sub>H</sub> 7.78 (b, 1H), 7.04 (b, 2H), 4.17 (b, 2H). <sup>13</sup>C{<sup>1</sup>H} NMR (75 MHz, CDCl<sub>3</sub>) δ<sub>C</sub> 139.8, 138.6, 136.9, 123.4, 122.5 ppm.

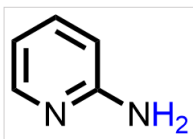

Pyridin-2-amine, **5y**.<sup>3</sup> Yield: 78% (37 mg). <sup>1</sup>H NMR (400 MHz, CDCl<sub>3</sub>): δ<sub>H</sub> 8.06 - 8.05 (m, 1H), 7.41 - 7.37 (m, 1H), 6.62 - 6.59 (m, 1H), 6.48 - 6.46 (d, 2H, *J* = 8 Hz). <sup>13</sup>C{<sup>1</sup>H} NMR (100 MHz, CDCl<sub>3</sub>) δ<sub>C</sub> 158.6, 147.9, 137.7, 113.8, 108.6 ppm.

## 6. NMR spectra of compounds 5a-5x.

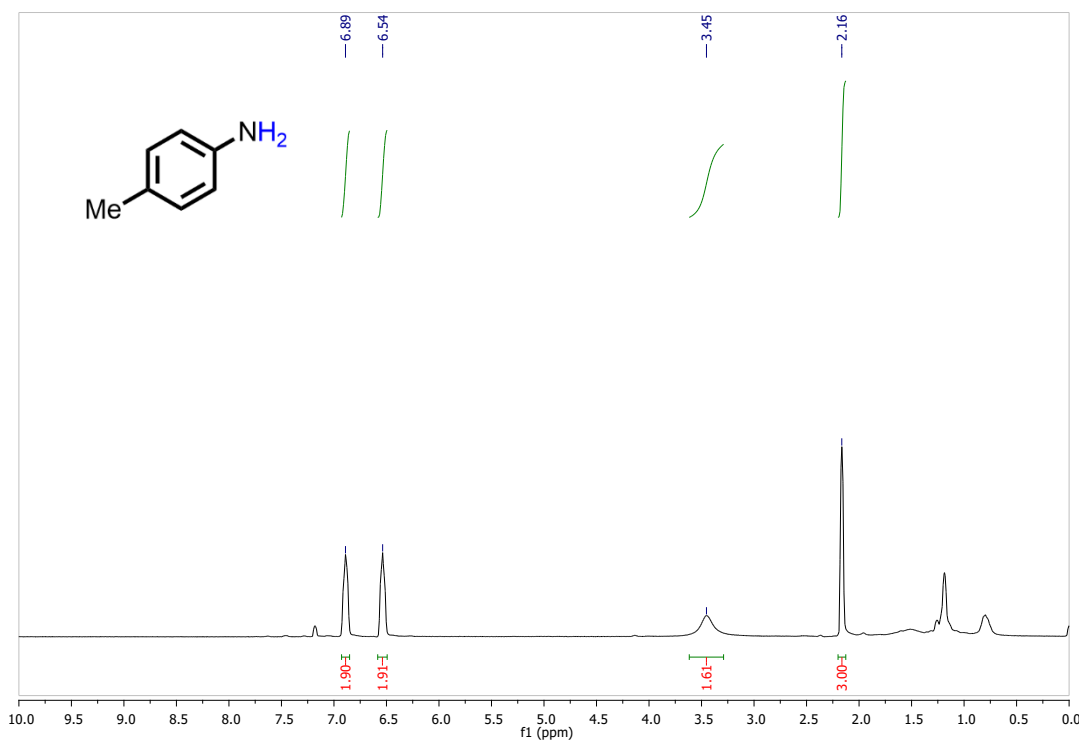

Figure S8. <sup>1</sup>H NMR Spectrum (300 MHz, 25 °C, CDCl<sub>3</sub>) of **5a**.

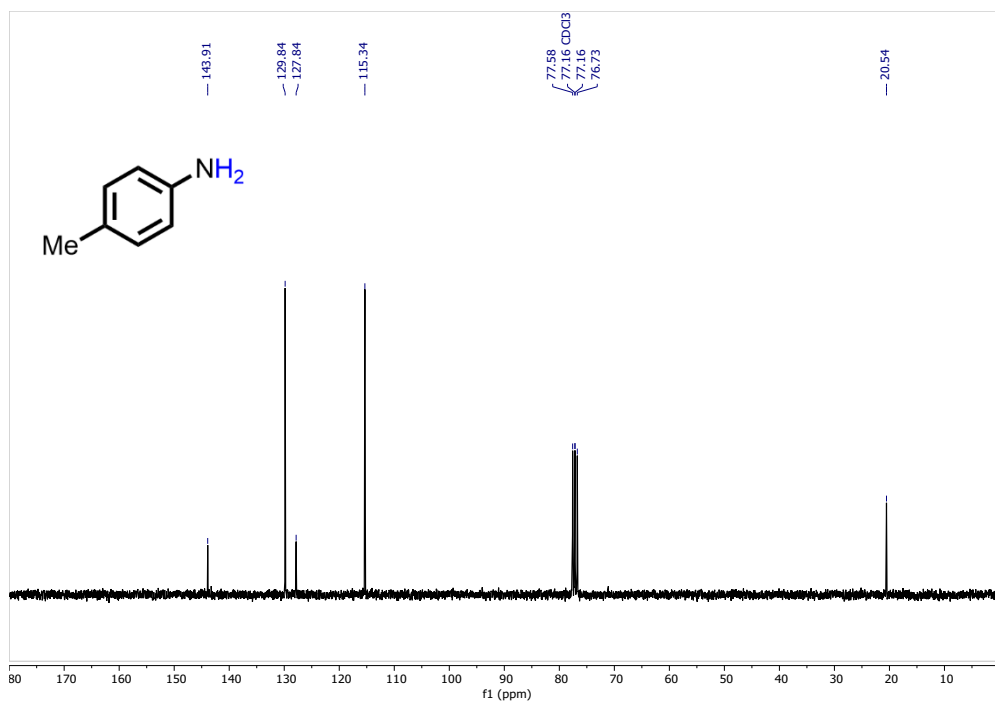

Figure S9.  $^{13}\text{C}\{^1\text{H}\}$  NMR Spectrum (75 MHz, 25 °C,  $\text{CDCl}_3$ ) of 5a.

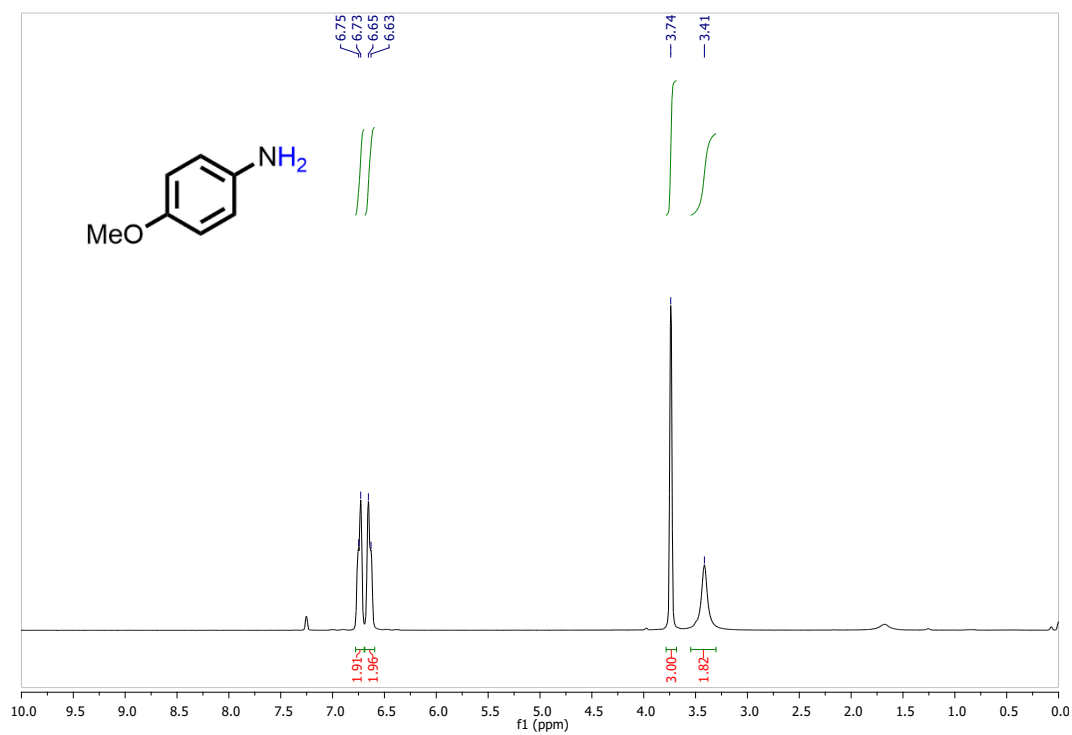

Figure S10.  $^1\text{H}$  NMR Spectrum (300 MHz, 25 °C,  $\text{CDCl}_3$ ) of 5b.

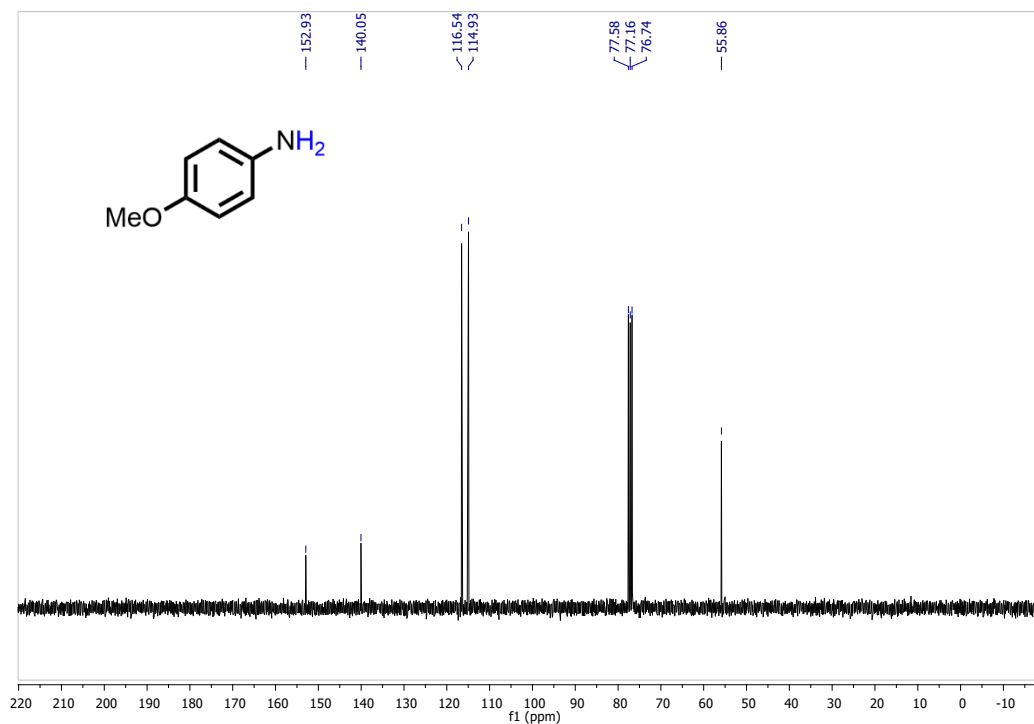

Figure S11.  $^{13}\text{C}\{^1\text{H}\}$  NMR Spectrum (75 MHz, 25 °C,  $\text{CDCl}_3$ ) of **5b**.

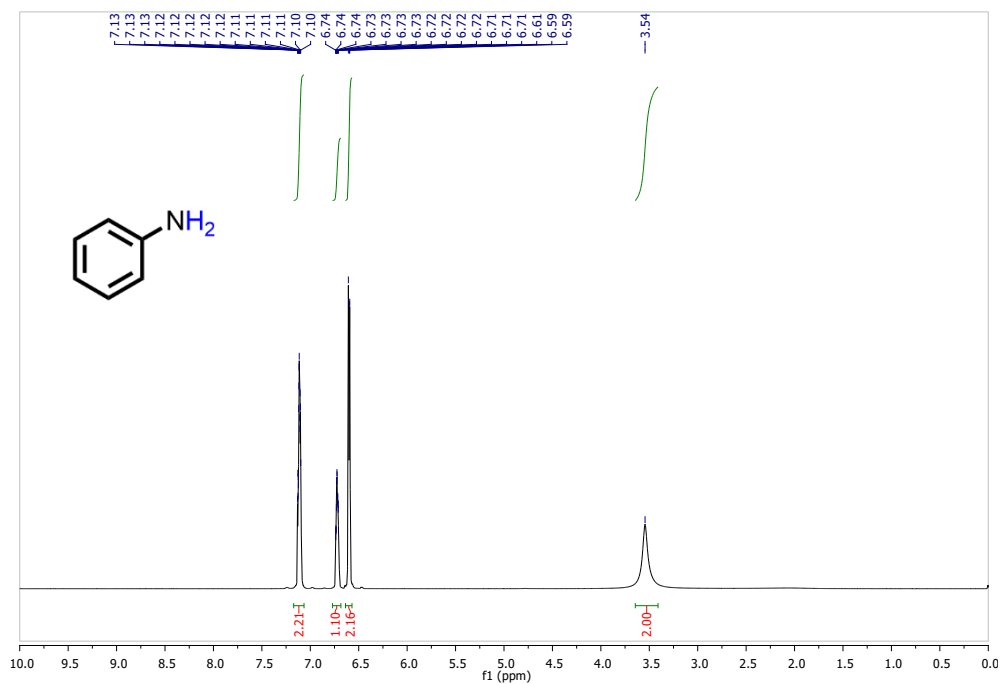

Figure S12.  $^1\text{H}$  NMR Spectrum (400 MHz, 25 °C,  $\text{CDCl}_3$ ) of **5c**.

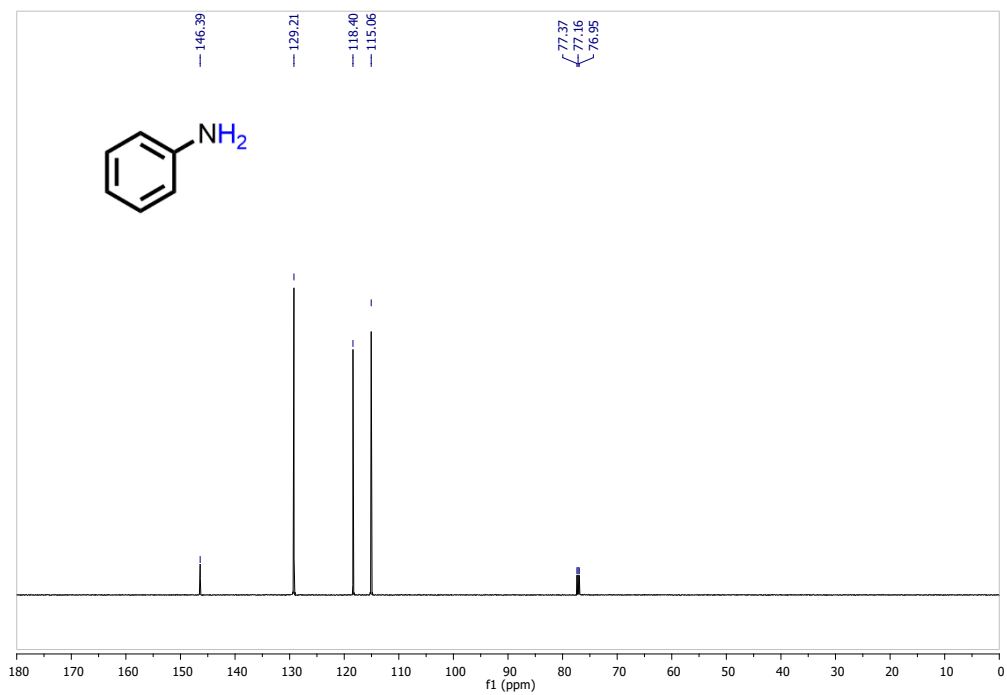

**Figure S13.**  $^{13}\text{C}\{^1\text{H}\}$  NMR Spectrum (100 MHz, 25 °C,  $\text{CDCl}_3$ ) of **5c**.

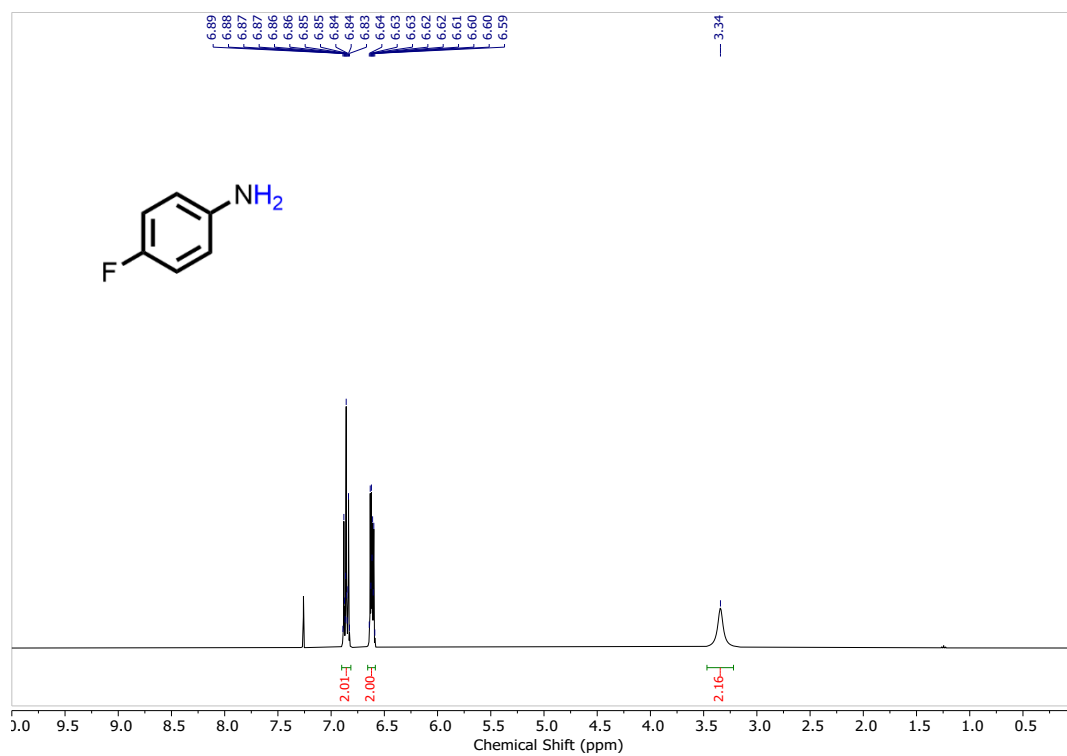

**Figure S14.**  $^1\text{H}$  NMR Spectrum (400 MHz, 25 °C,  $\text{CDCl}_3$ ) of **5d**.



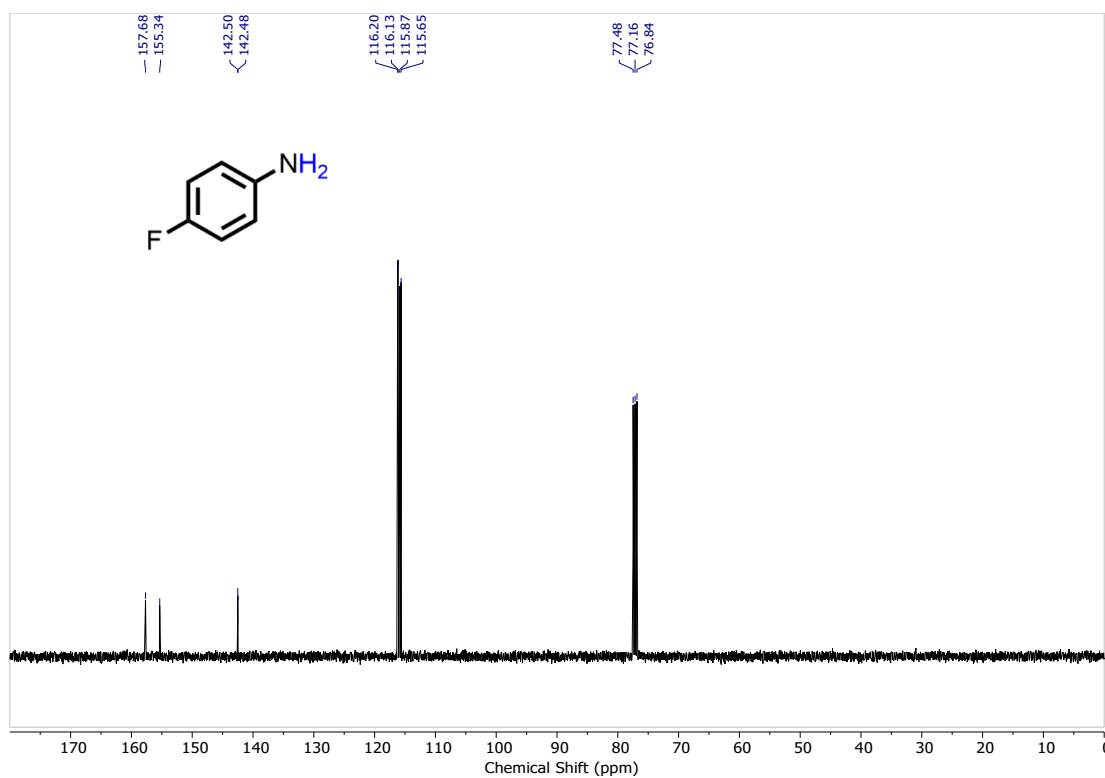

**Figure S15.**  $^{13}\text{C}\{^1\text{H}\}$  NMR Spectrum (100 MHz, 25 °C,  $\text{CDCl}_3$ ) of 5d.

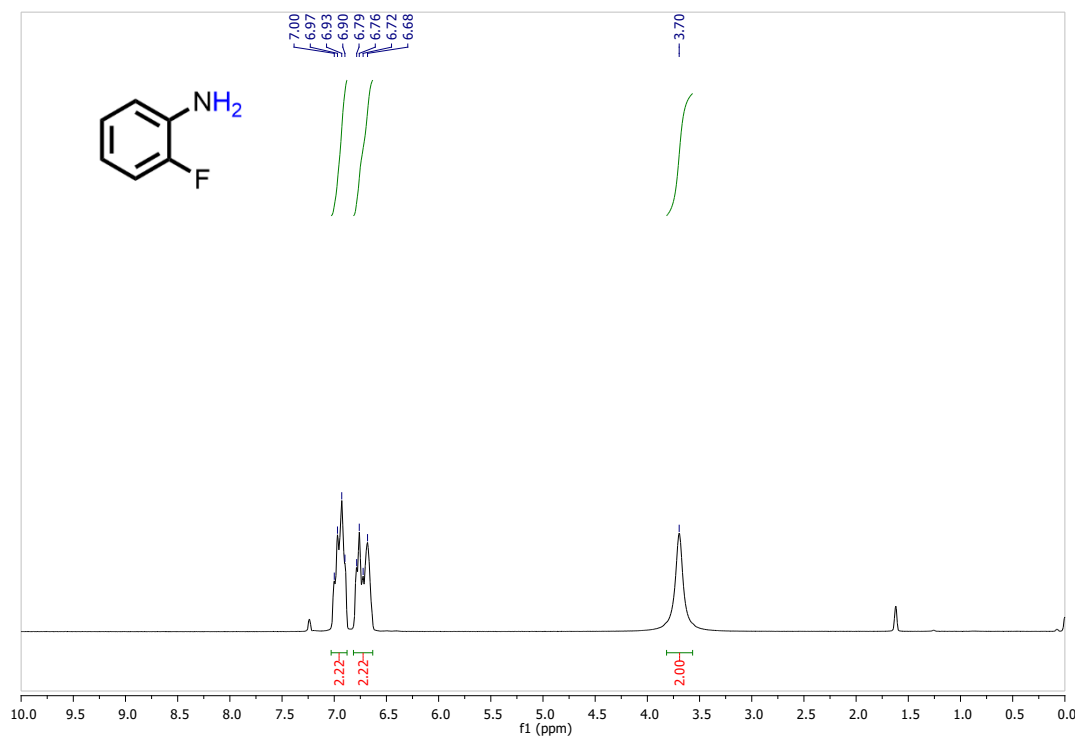

**Figure S16.**  $^1\text{H}$  NMR Spectrum (300 MHz, 25 °C,  $\text{CDCl}_3$ ) of 5e.

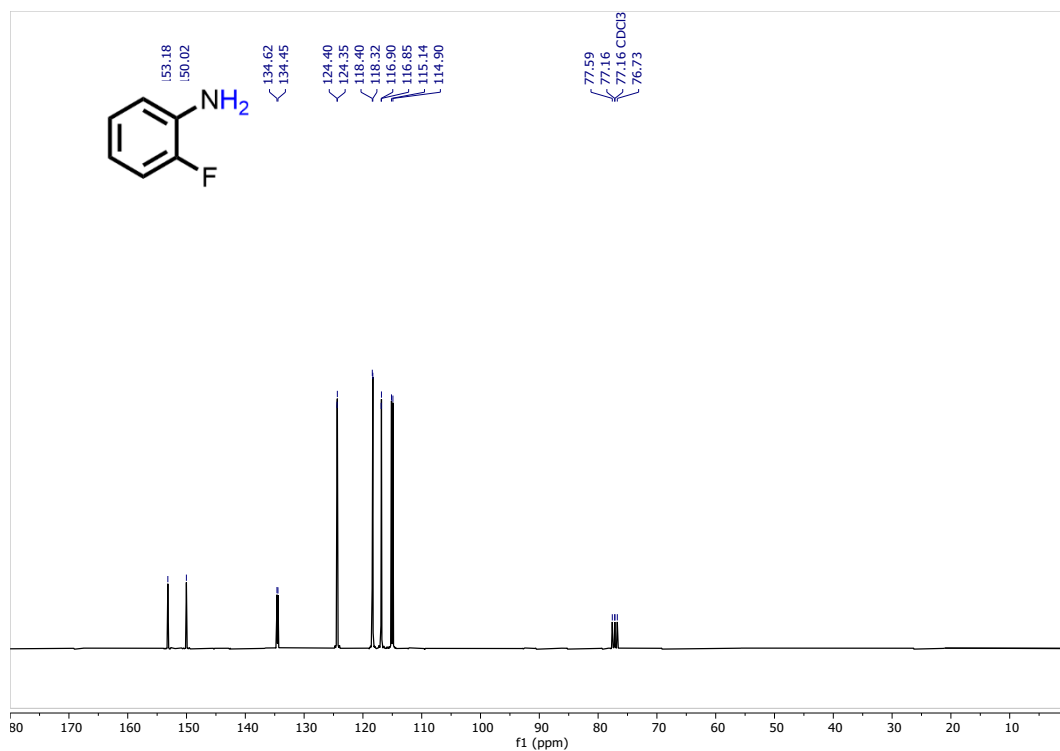

**Figure S17.**  $^{13}\text{C}\{^1\text{H}\}$  NMR Spectrum (75 MHz, 25 °C,  $\text{CDCl}_3$ ) of **5e**.

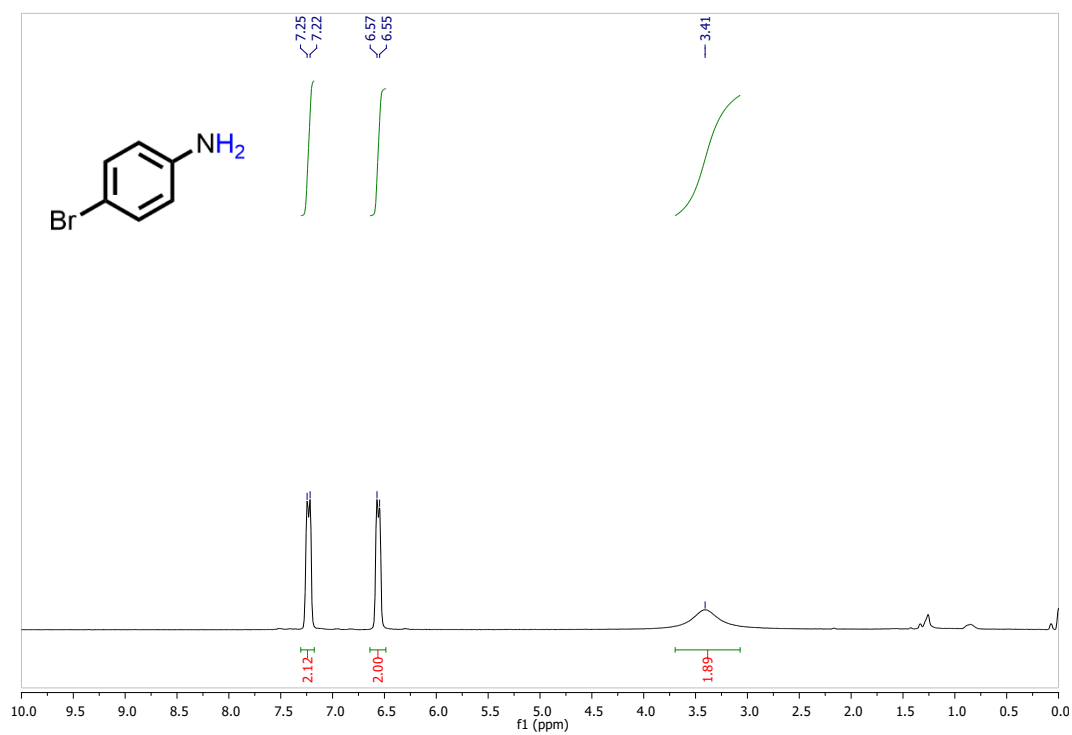

**Figure S18.**  $^1\text{H}$  NMR Spectrum (300 MHz, 25 °C,  $\text{CDCl}_3$ ) of **5f**.

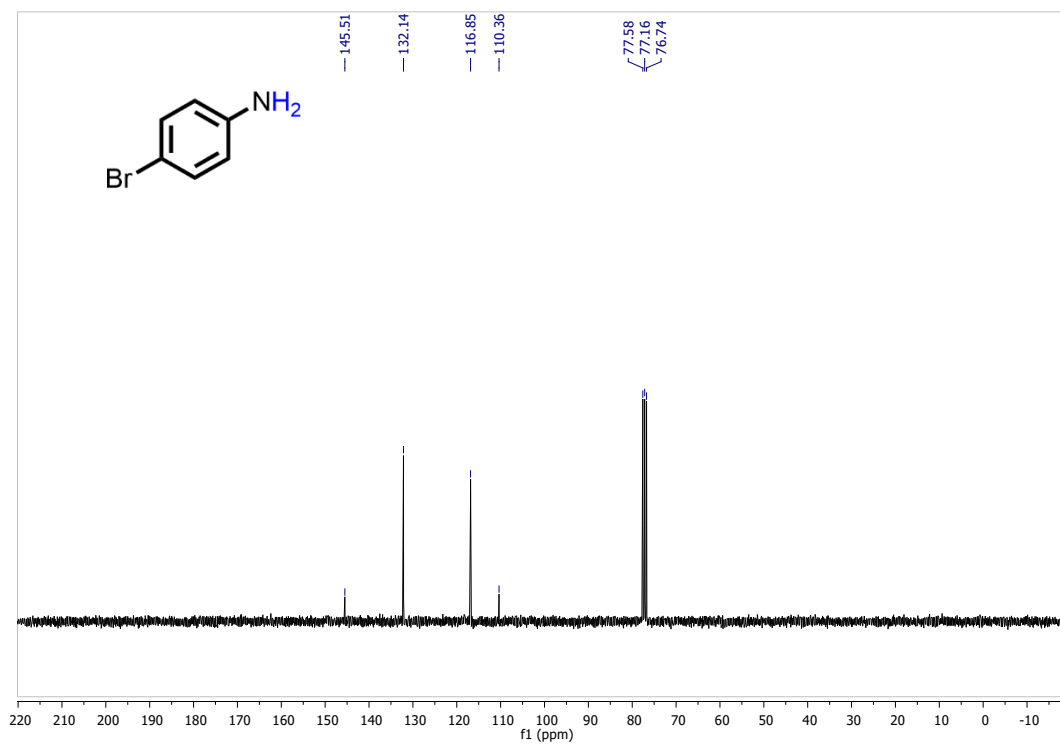

**Figure S19.**  $^{13}\text{C}\{^1\text{H}\}$  NMR Spectrum (75 MHz, 25 °C,  $\text{CDCl}_3$ ) of **5f**.

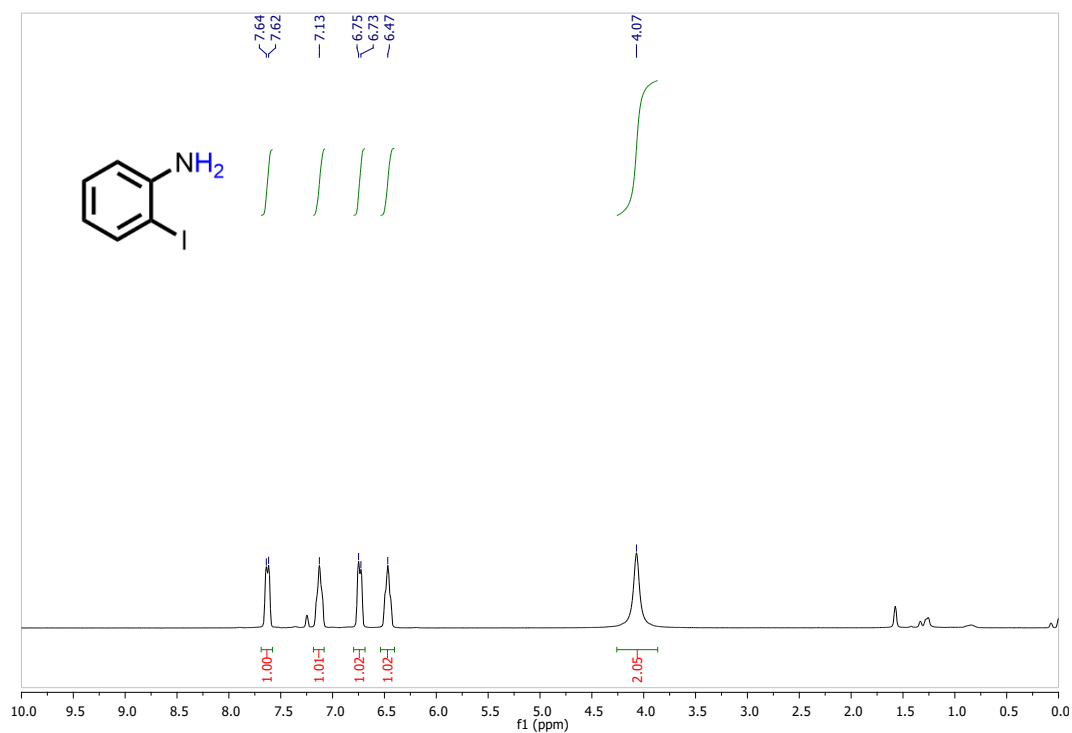

**Figure S20.**  $^1\text{H}$  NMR Spectrum (300 MHz, 25 °C,  $\text{CDCl}_3$ ) of **5g**.

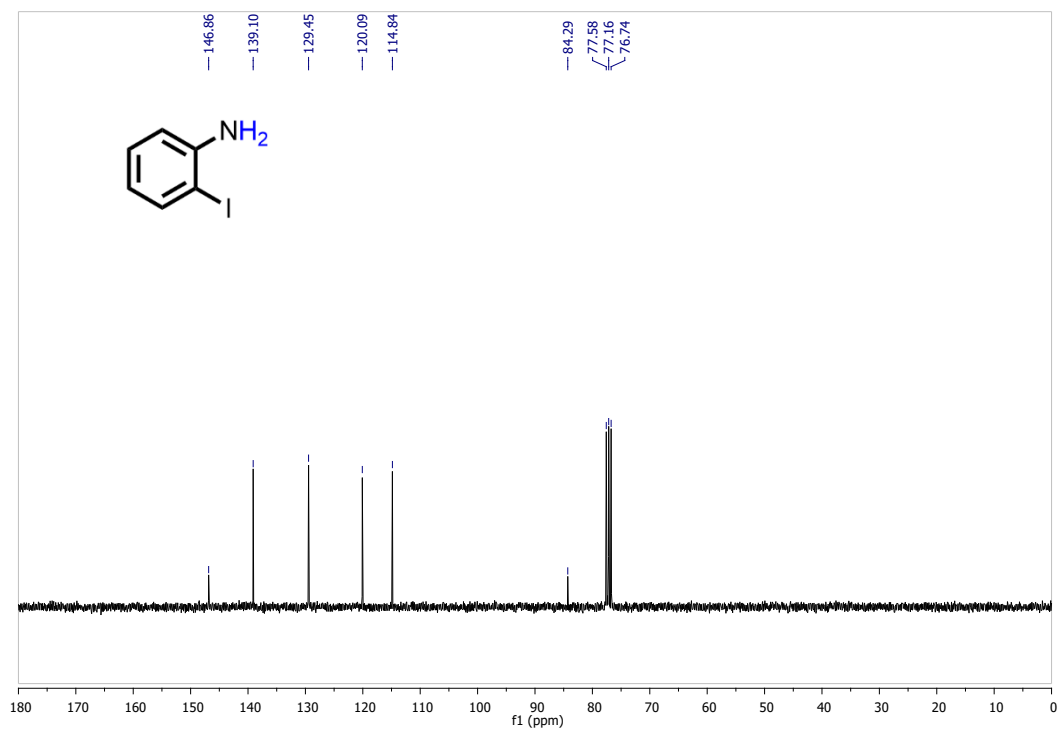

Figure S21.  $^{13}\text{C}\{^1\text{H}\}$  NMR Spectrum (75 MHz, 25 °C,  $\text{CDCl}_3$ ) of **5g**.

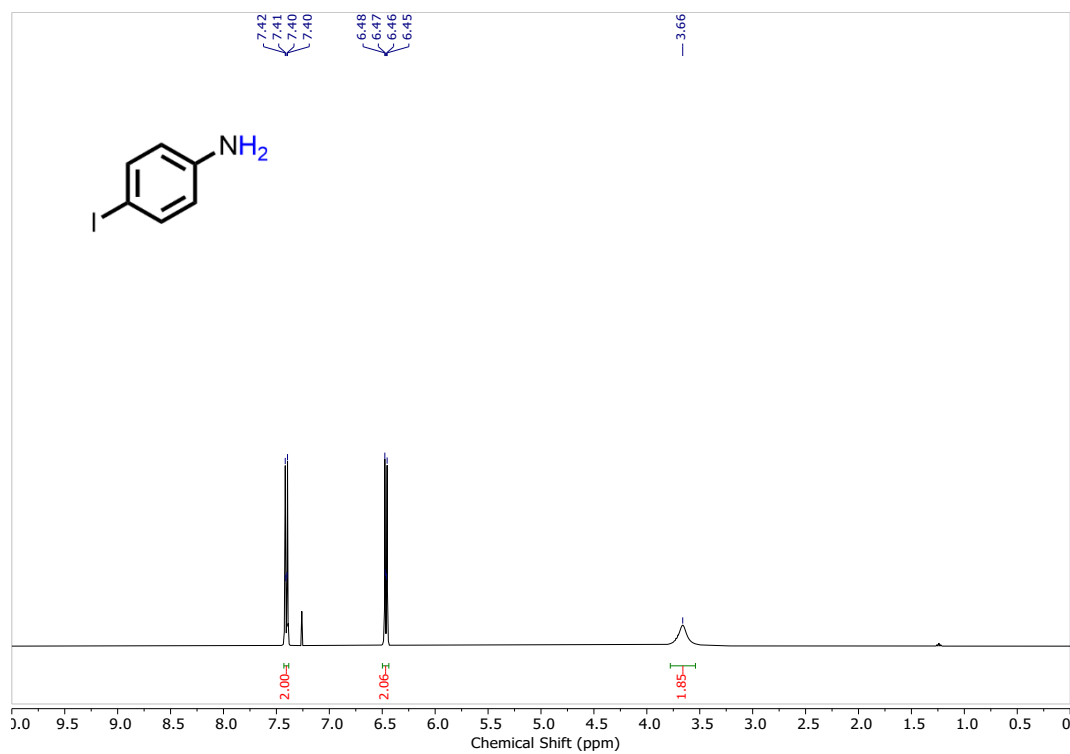

Figure S22.  $^1\text{H}$  NMR Spectrum (400 MHz, 25 °C,  $\text{CDCl}_3$ ) of **5h**.

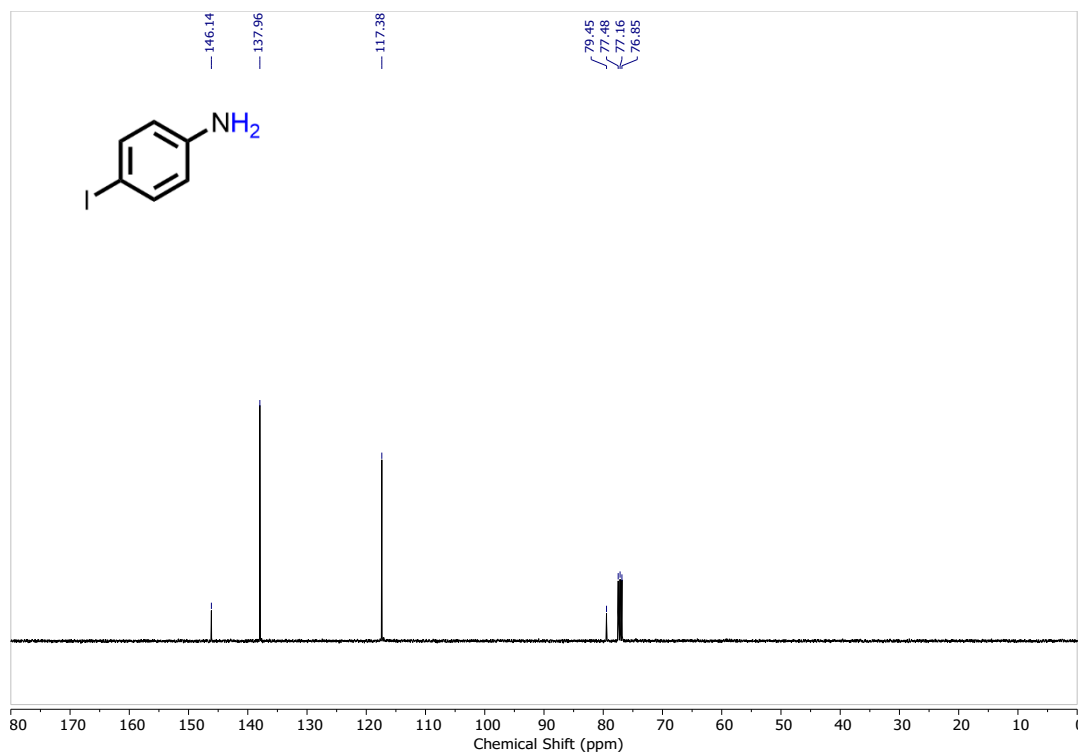

Figure S23.  $^{13}\text{C}\{^1\text{H}\}$  NMR Spectrum (75 MHz, 25 °C,  $\text{CDCl}_3$ ) of **5h**.

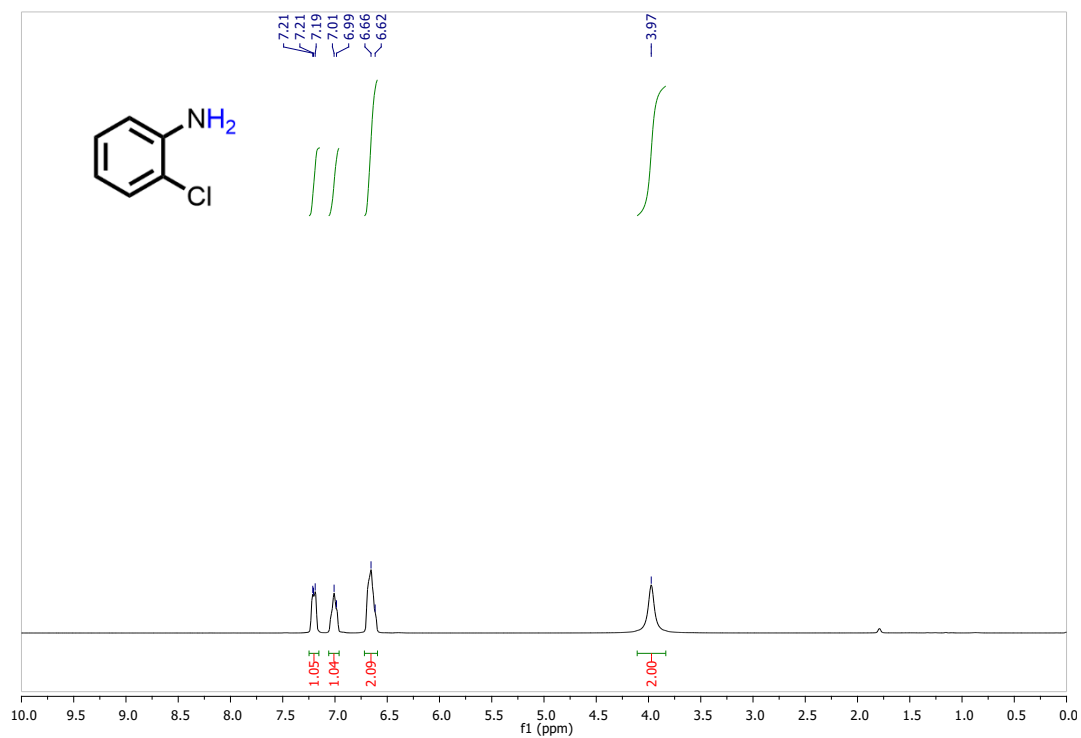

Figure S24.  $^1\text{H}$  NMR Spectrum (300 MHz, 25 °C,  $\text{CDCl}_3$ ) of **5i**.

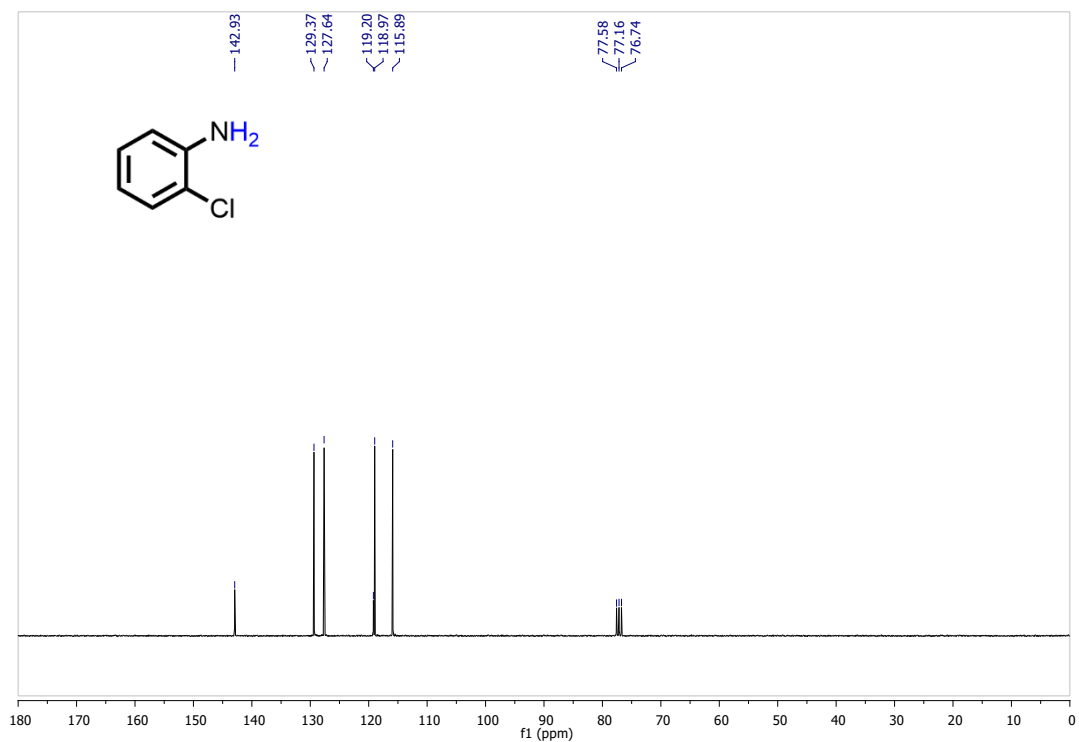

Figure S25.  $^{13}\text{C}\{^1\text{H}\}$  NMR Spectrum (75 MHz, 25 °C,  $\text{CDCl}_3$ ) of **5i**.

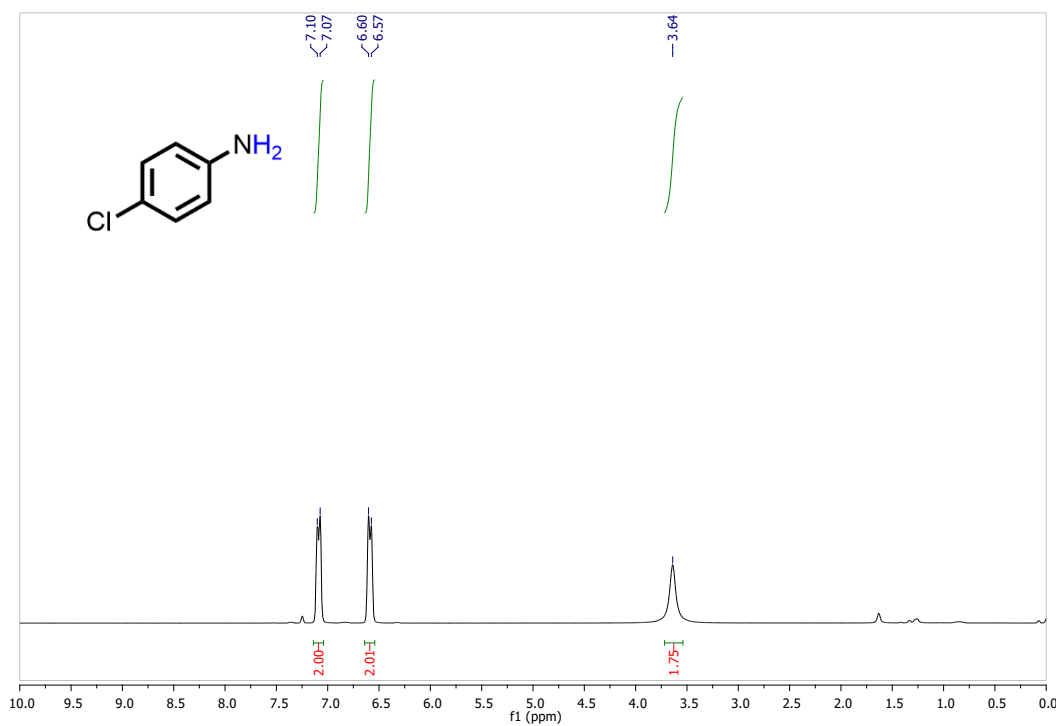

Figure S26.  $^1\text{H}$  NMR Spectrum (300 MHz, 25 °C,  $\text{CDCl}_3$ ) of **5j**.

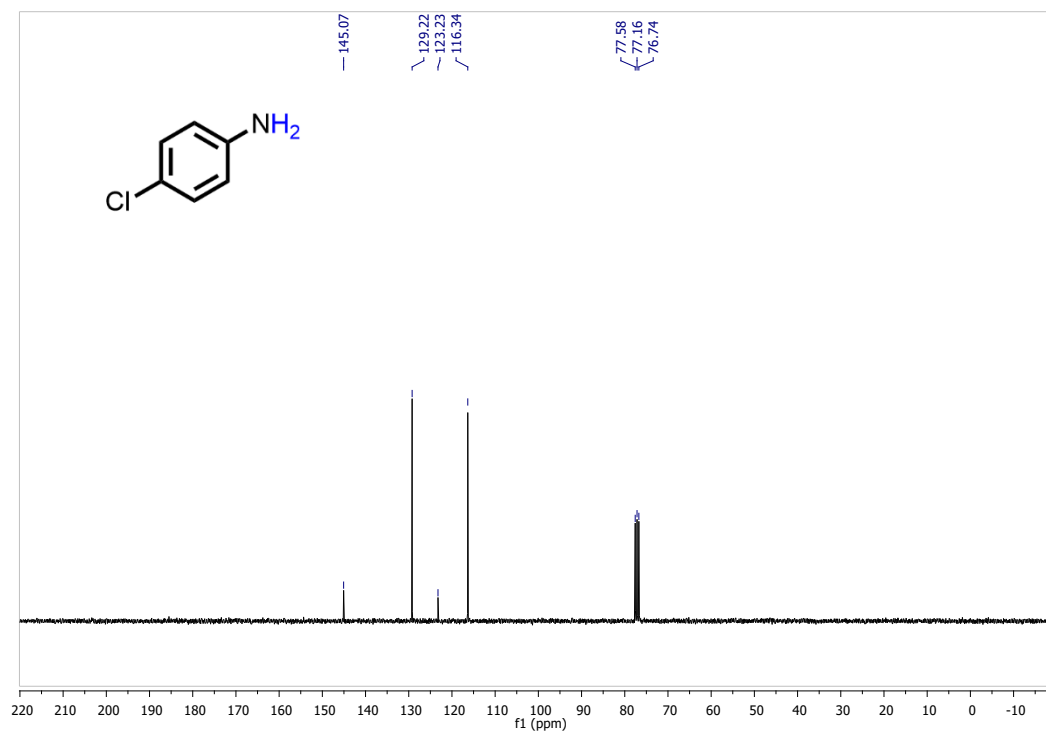

Figure S27.  $^{13}\text{C}\{^1\text{H}\}$  NMR Spectrum (75 MHz, 25 °C,  $\text{CDCl}_3$ ) of **5j**.

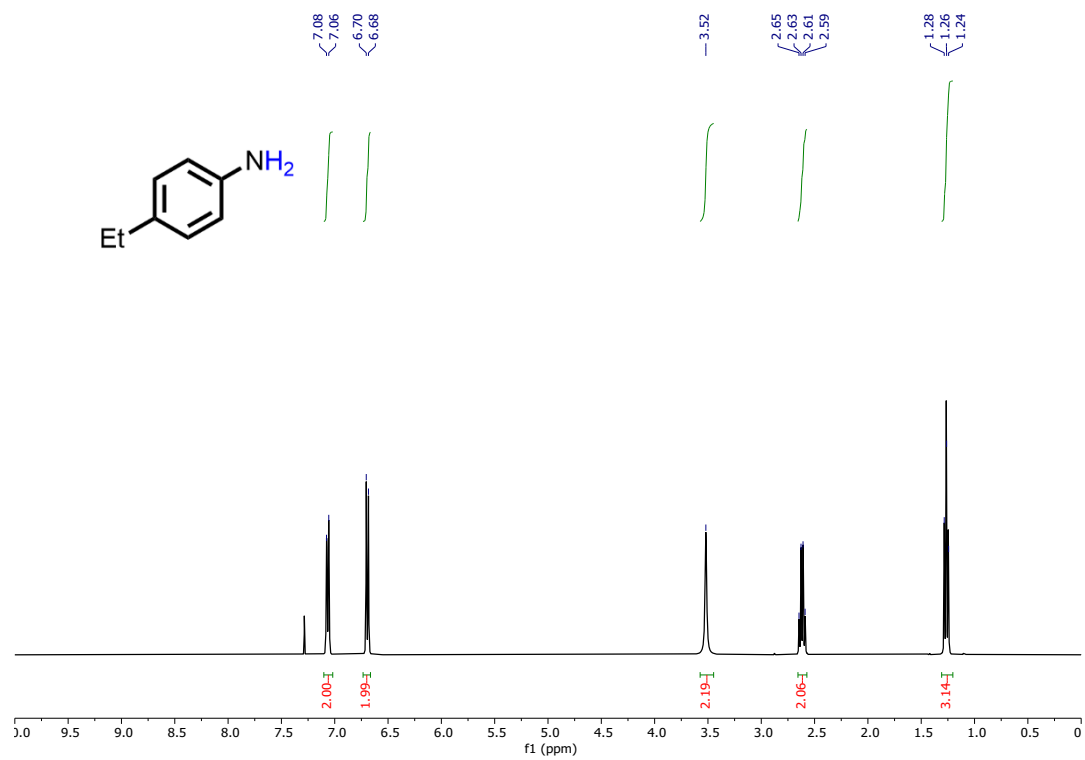

Figure S28.  $^1\text{H}$  NMR Spectrum (400 MHz, 25 °C,  $\text{CDCl}_3$ ) of **5k**.

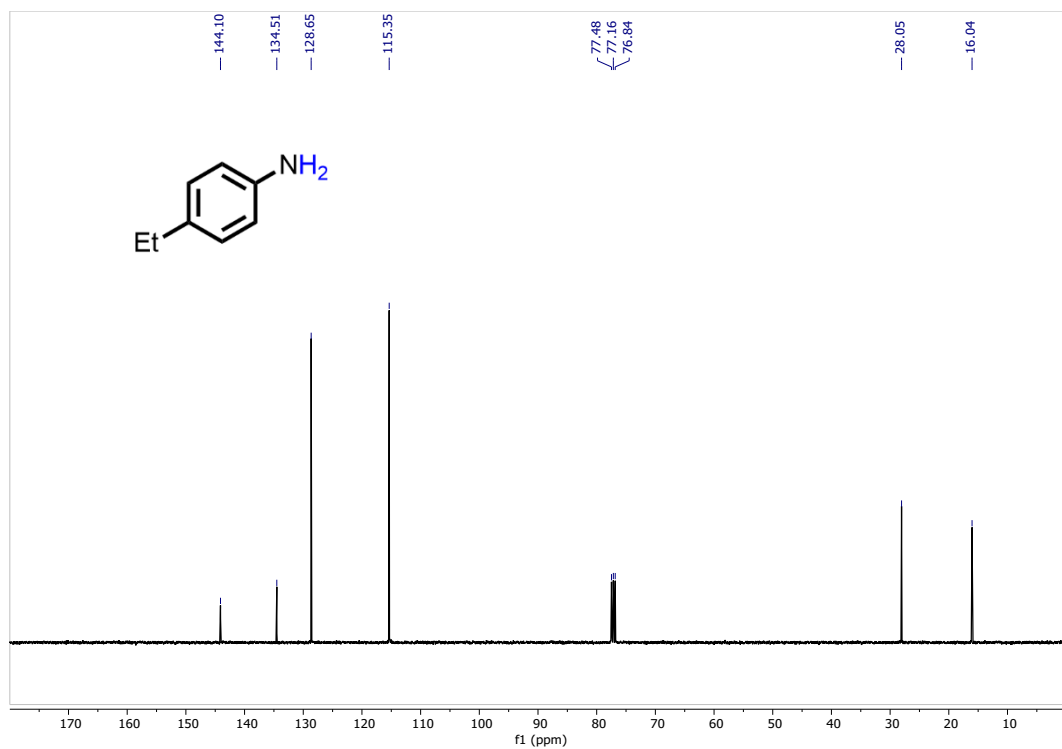

Figure S29.  $^{13}\text{C}\{^1\text{H}\}$  NMR Spectrum (100 MHz, 25 °C,  $\text{CDCl}_3$ ) of 5k.

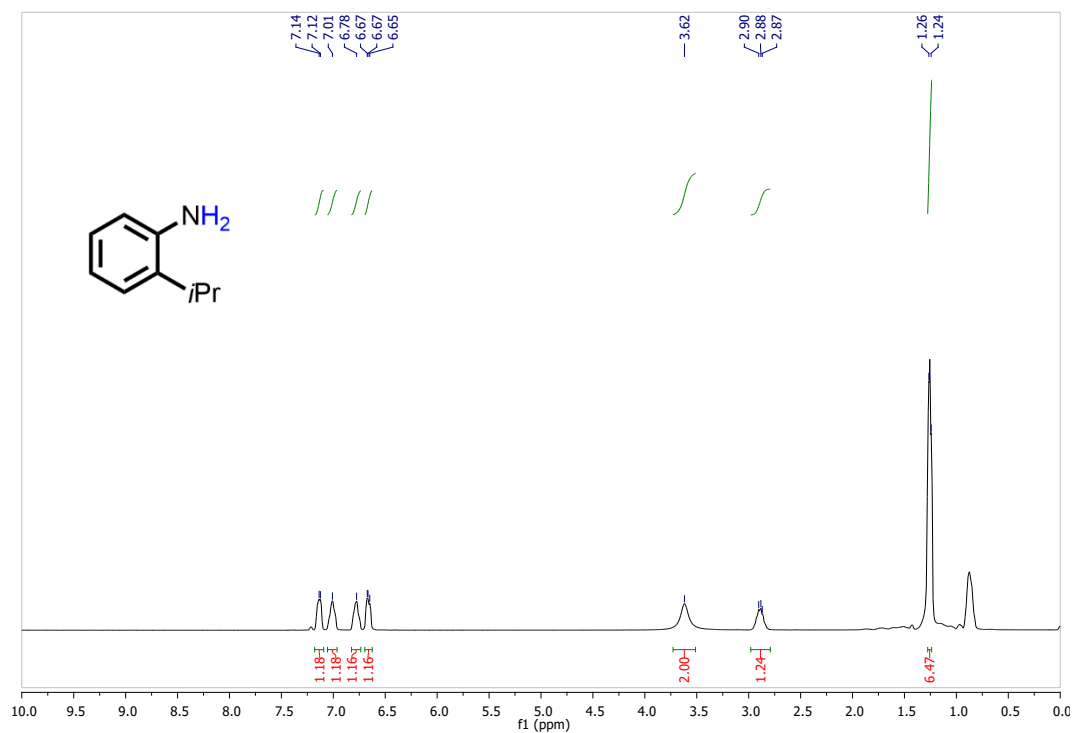

Figure S30.  $^1\text{H}$  NMR Spectrum (300 MHz, 25 °C,  $\text{CDCl}_3$ ) of 5l.



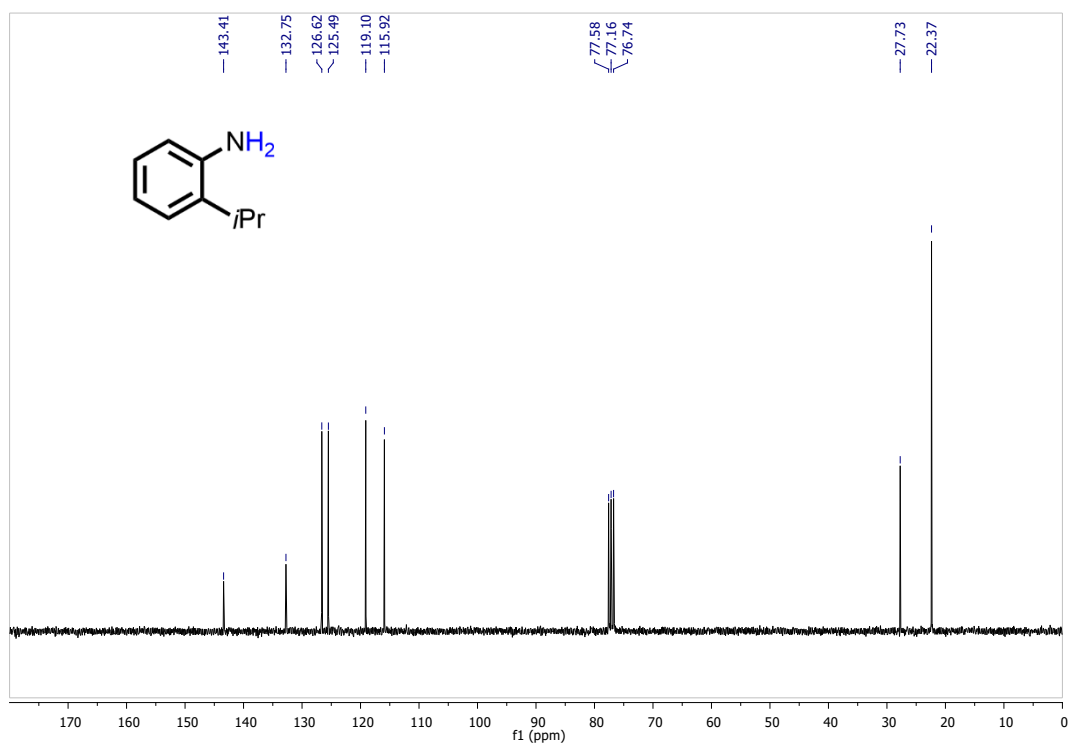

Figure S31.  $^{13}\text{C}\{^1\text{H}\}$  NMR Spectrum (75 MHz, 25 °C,  $\text{CDCl}_3$ ) of **5l**.

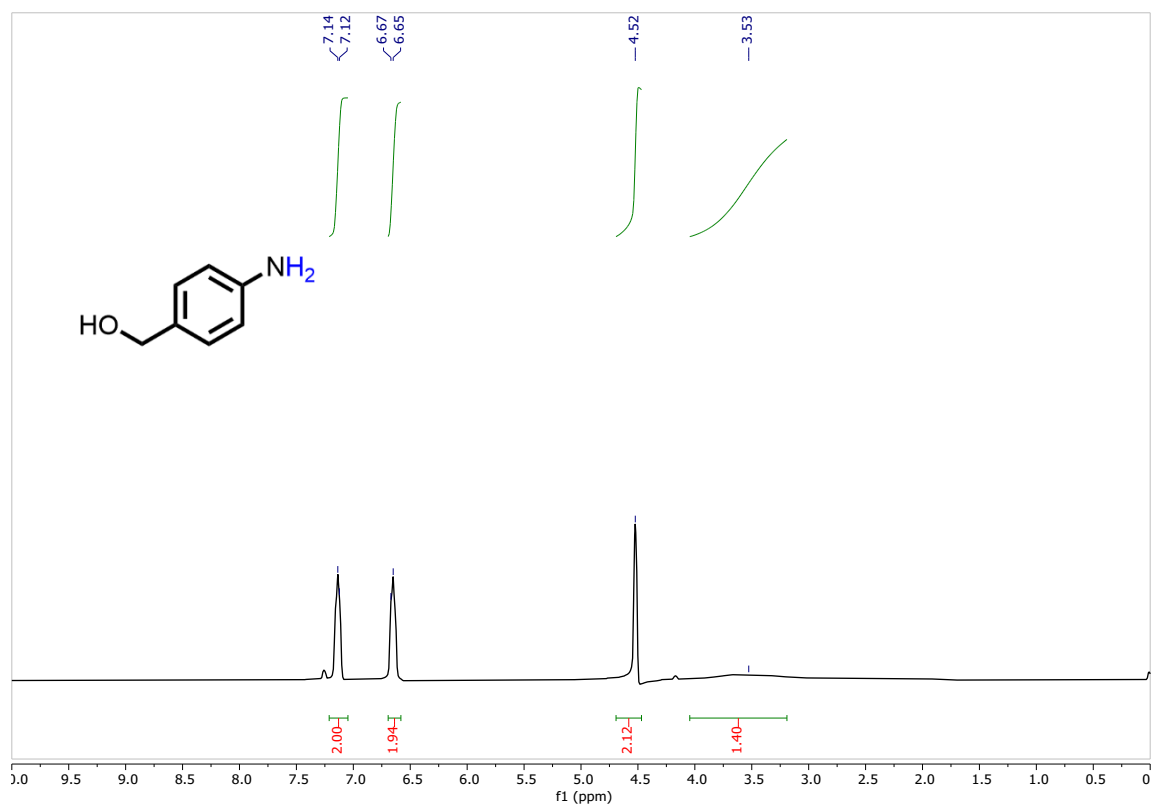

Figure S32.  $^1\text{H}$  NMR Spectrum (300 MHz, 25 °C,  $\text{CDCl}_3$ ) of **5m**.

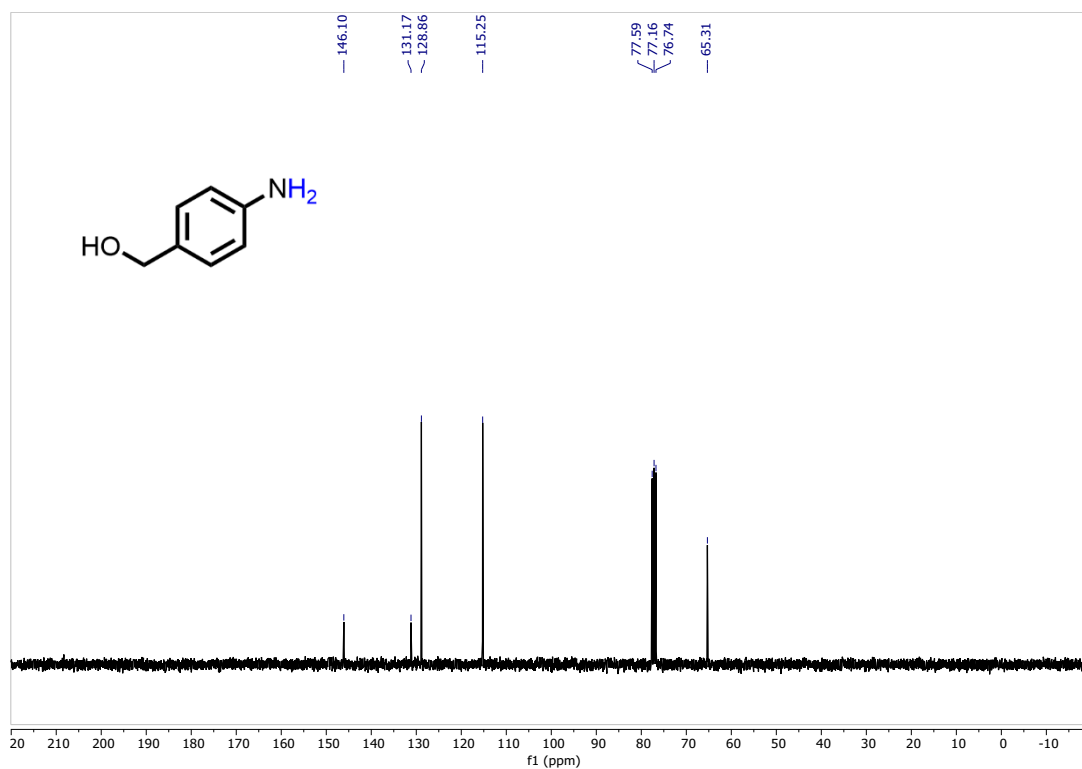

Figure S33.  $^{13}\text{C}\{^1\text{H}\}$  NMR Spectrum (75 MHz, 25 °C,  $\text{CDCl}_3$ ) of 5m.

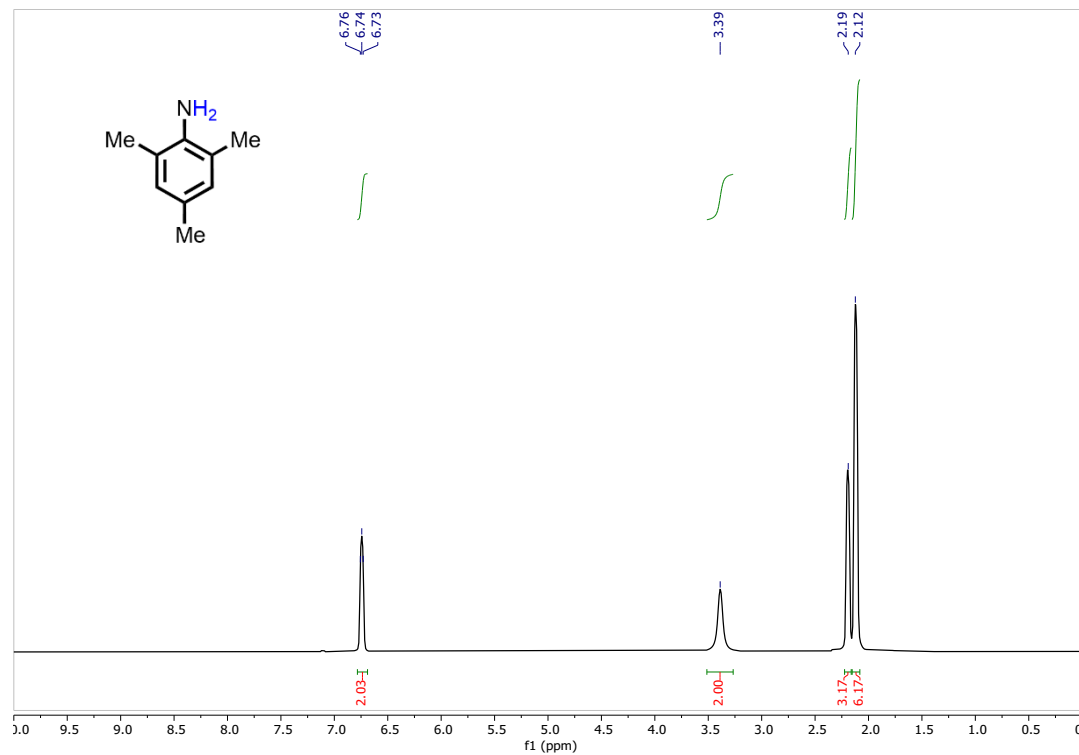

Figure S34.  $^1\text{H}$  NMR Spectrum (300 MHz, 25 °C,  $\text{CDCl}_3$ ) of 5n.

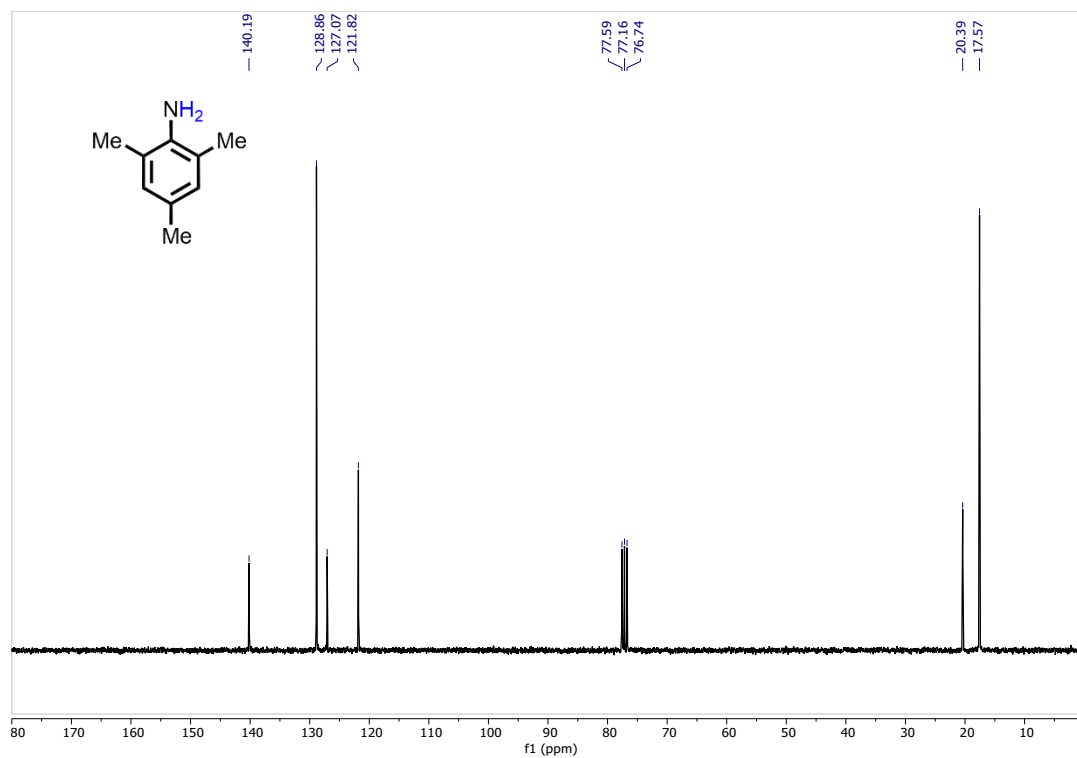

Figure S35.  $^{13}\text{C}\{^1\text{H}\}$  NMR Spectrum (75 MHz, 25 °C,  $\text{CDCl}_3$ ) of 5n.

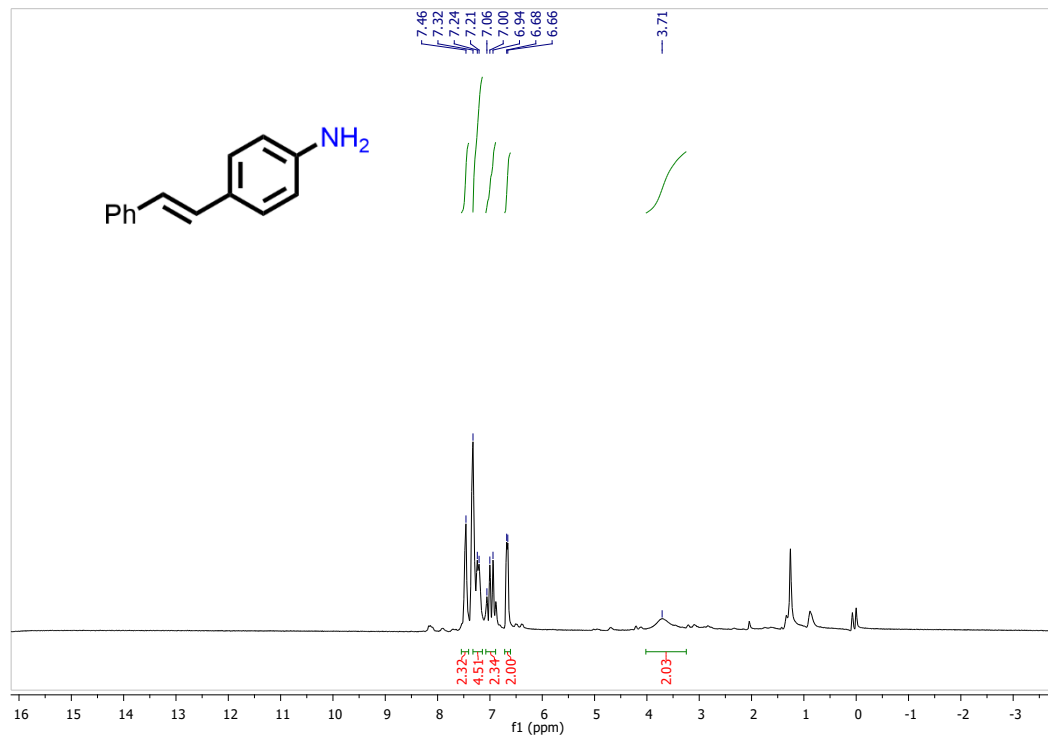

Figure S36.  $^1\text{H}$  NMR Spectrum (300 MHz, 25 °C,  $\text{CDCl}_3$ ) of 5o. Hexane peak at 1.26 ppm.

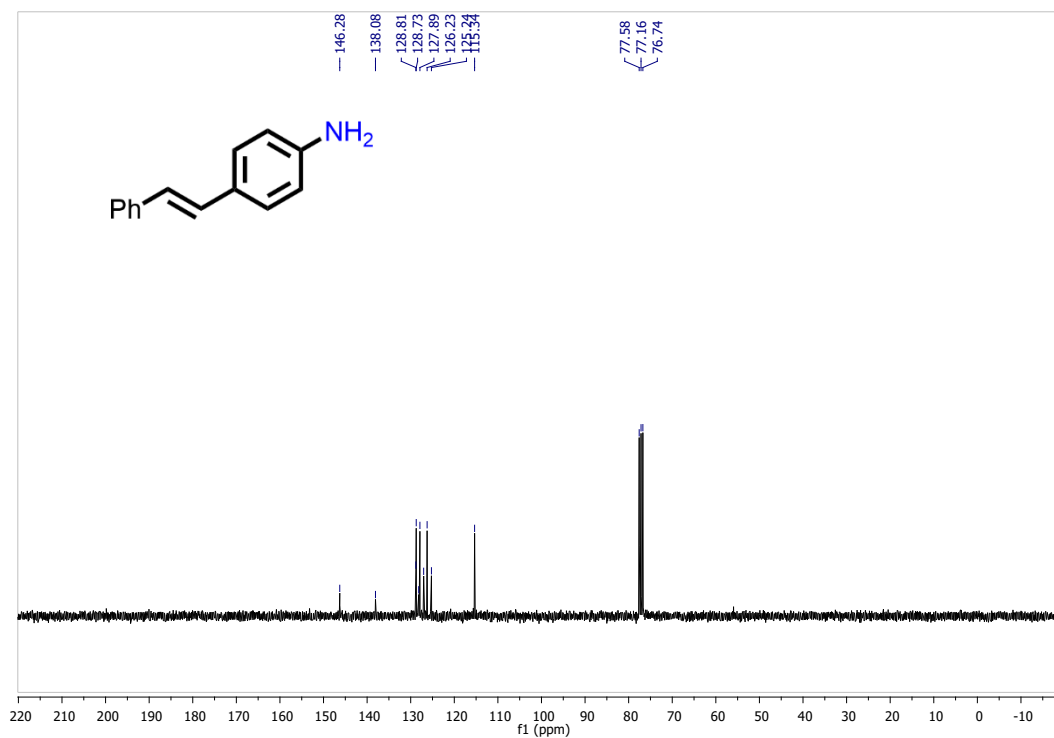

**Figure S37.**  $^{13}\text{C}\{^1\text{H}\}$  NMR Spectrum (75 MHz, 25 °C,  $\text{CDCl}_3$ ) of **5o**.

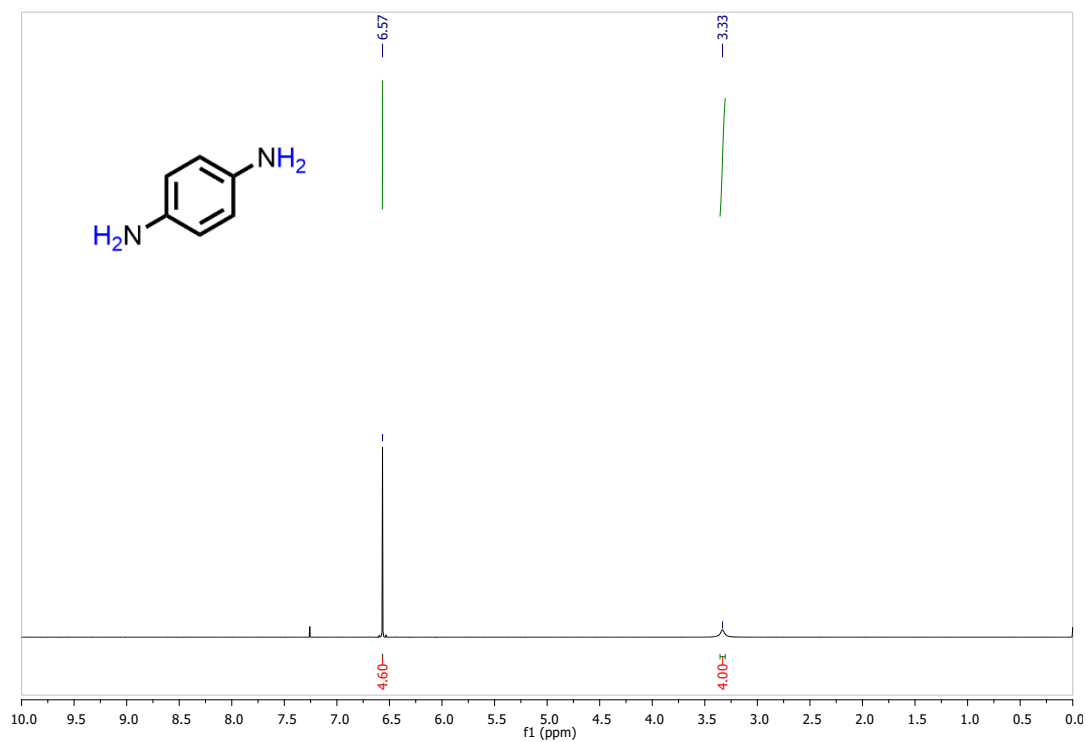

**Figure S38.**  $^1\text{H}$  NMR Spectrum (400 MHz, 25 °C,  $\text{CDCl}_3$ ) of **5p**.

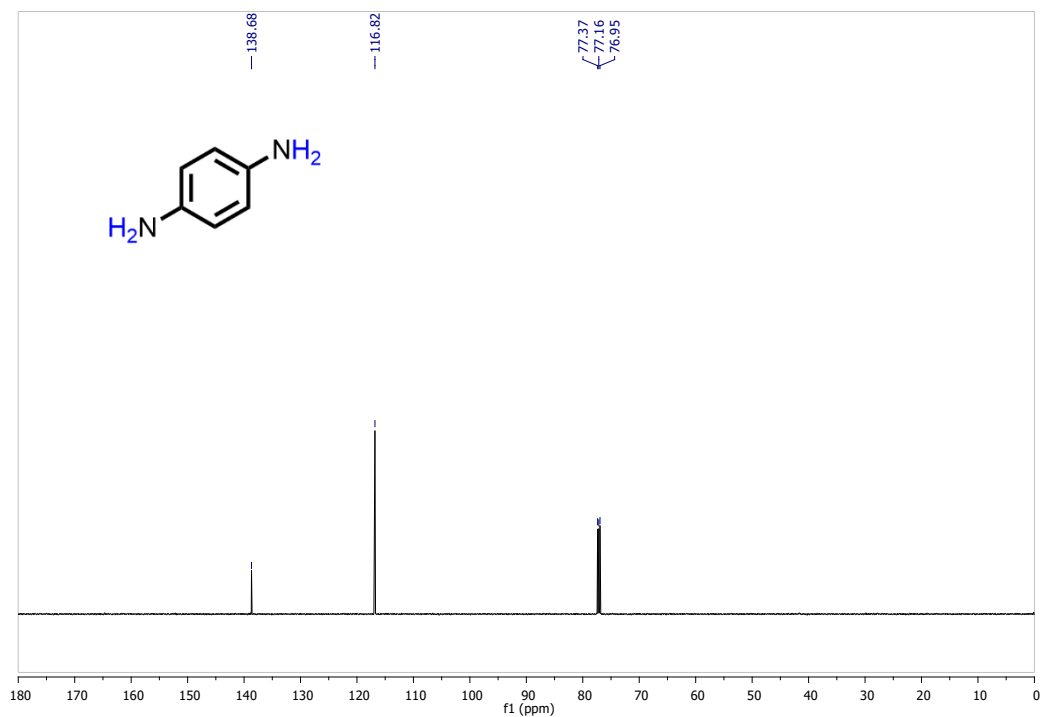

Figure S39.  $^{13}\text{C}\{^1\text{H}\}$  NMR Spectrum (100 MHz, 25 °C,  $\text{CDCl}_3$ ) of **5p**.

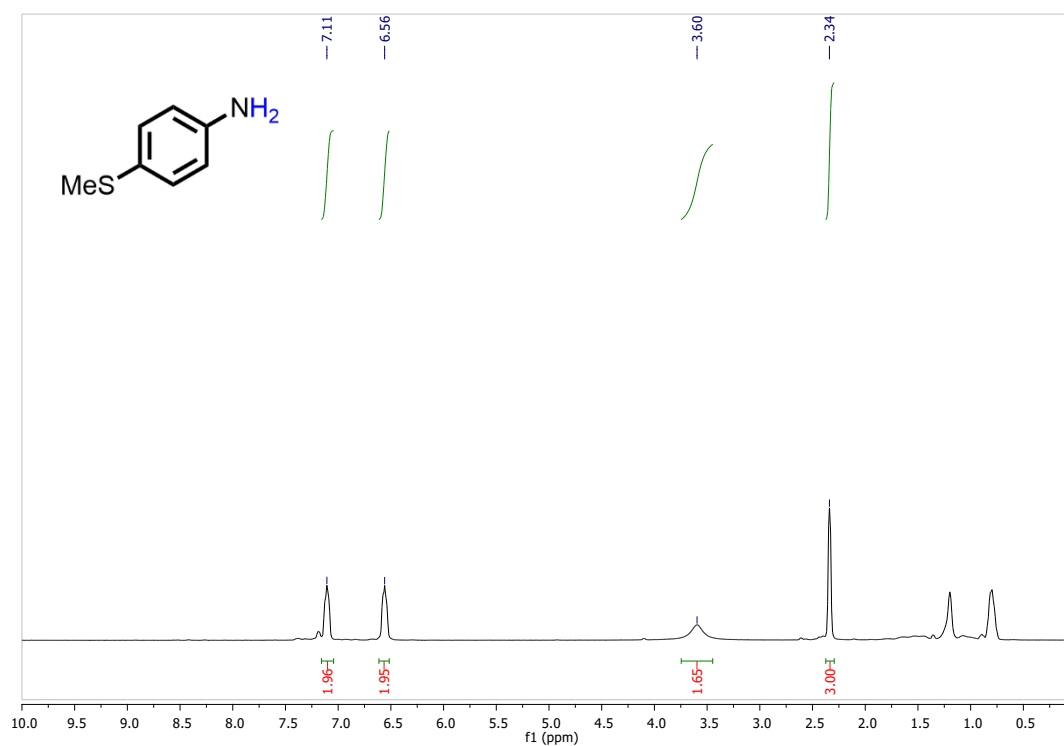

Figure S40.  $^1\text{H}$  NMR Spectrum (300 MHz, 25 °C,  $\text{CDCl}_3$ ) of **5q**.

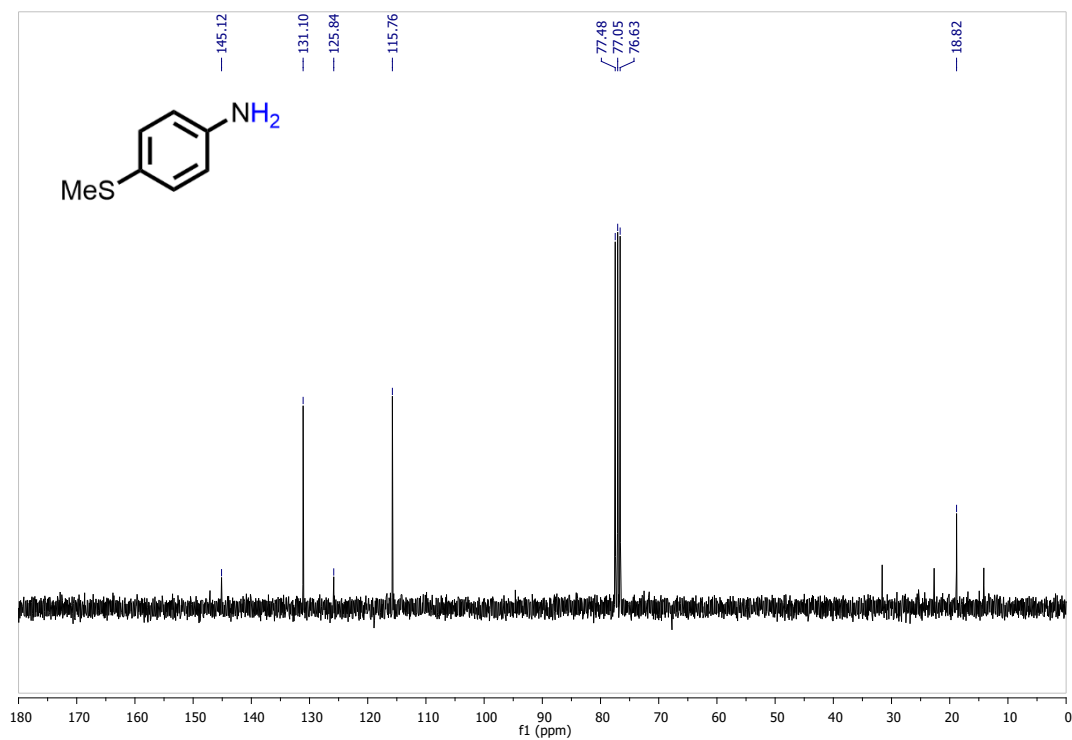

Figure S41.  $^{13}\text{C}\{^1\text{H}\}$  NMR Spectrum (75 MHz, 25 °C,  $\text{CDCl}_3$ ) of 5q.

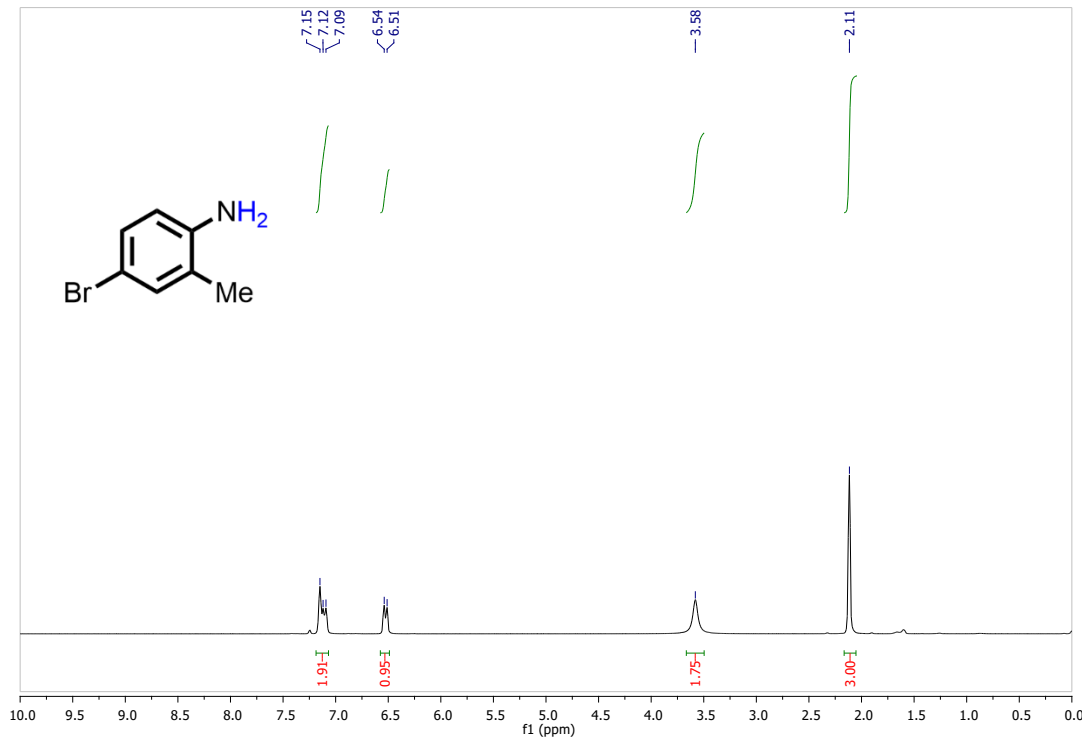

Figure S42.  $^1\text{H}$  NMR Spectrum (300 MHz, 25 °C,  $\text{CDCl}_3$ ) of 5r.

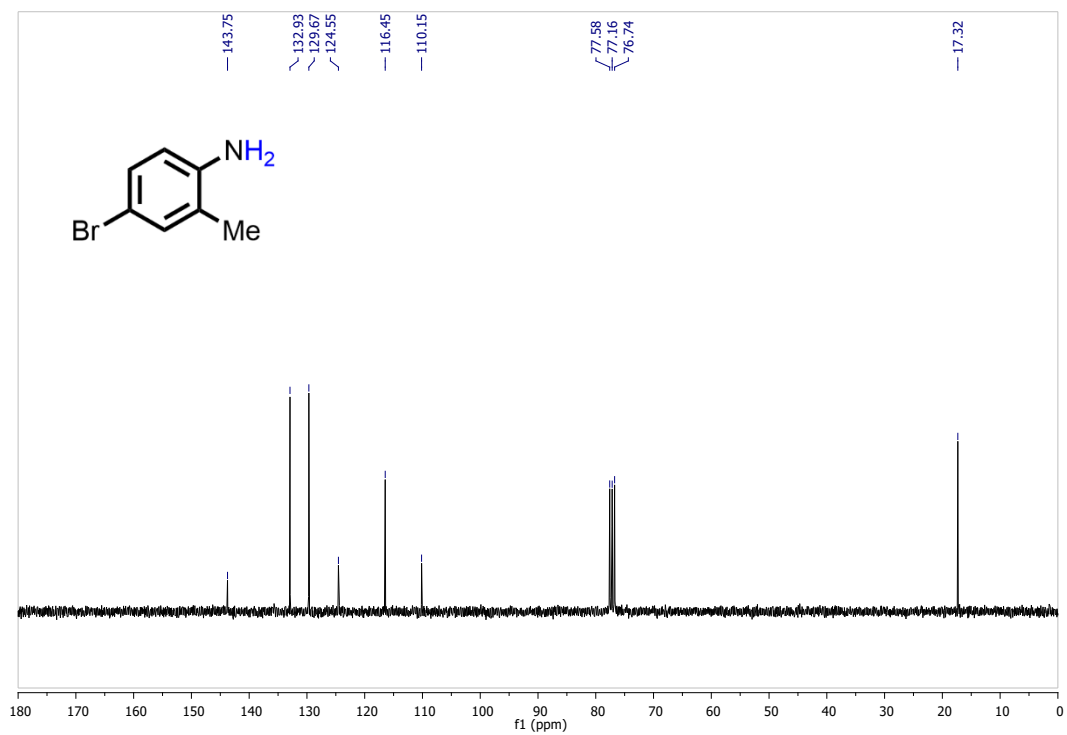

Figure S43.  $^{13}\text{C}\{^1\text{H}\}$  NMR Spectrum (75 MHz, 25 °C,  $\text{CDCl}_3$ ) of **5r**.

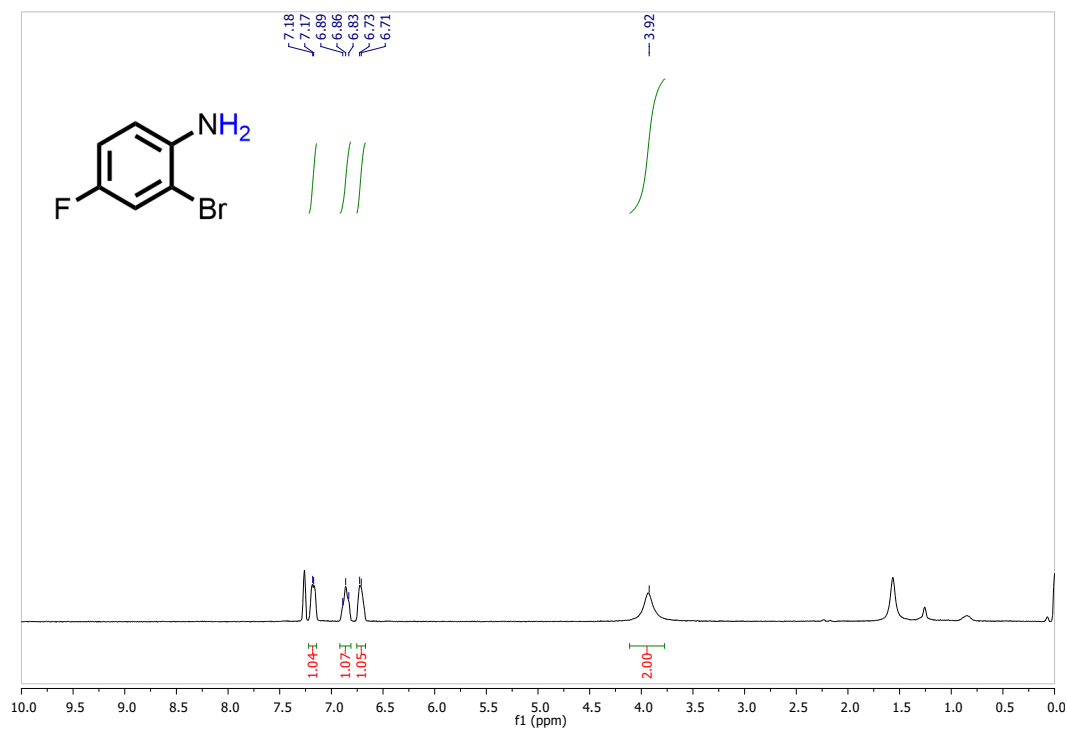

Figure S44.  $^1\text{H}$  NMR Spectrum (300 MHz, 25 °C,  $\text{CDCl}_3$ ) of **5s**.

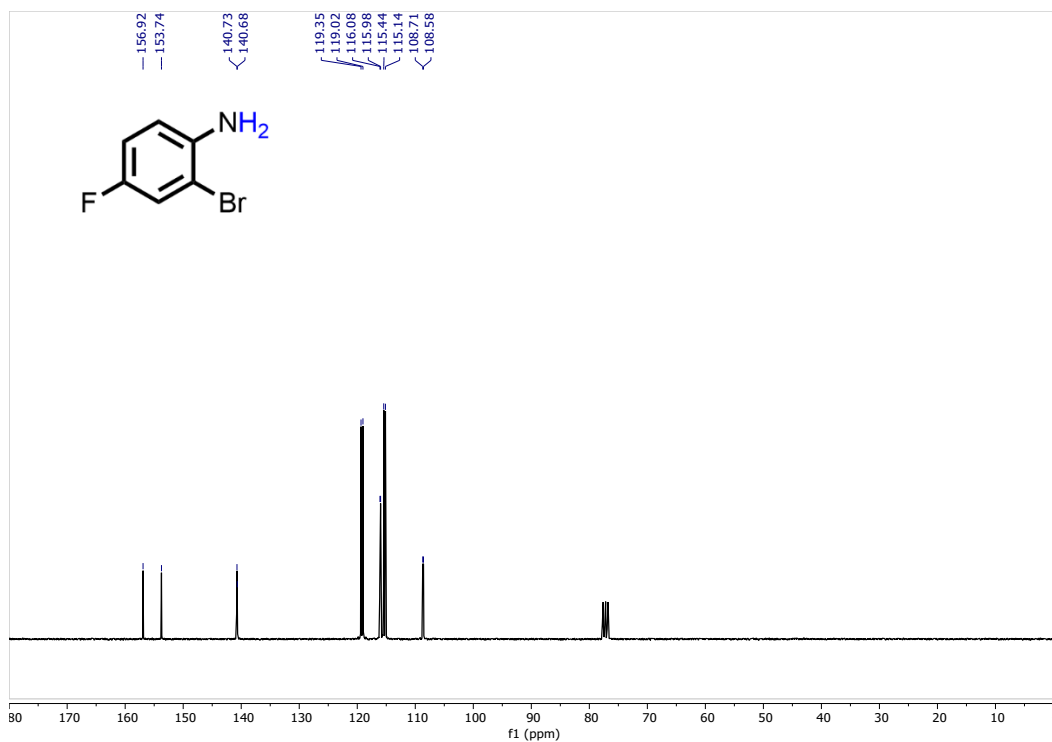

Figure S45.  $^{13}\text{C}\{^1\text{H}\}$  NMR Spectrum (75 MHz, 25 °C,  $\text{CDCl}_3$ ) of **5s**.

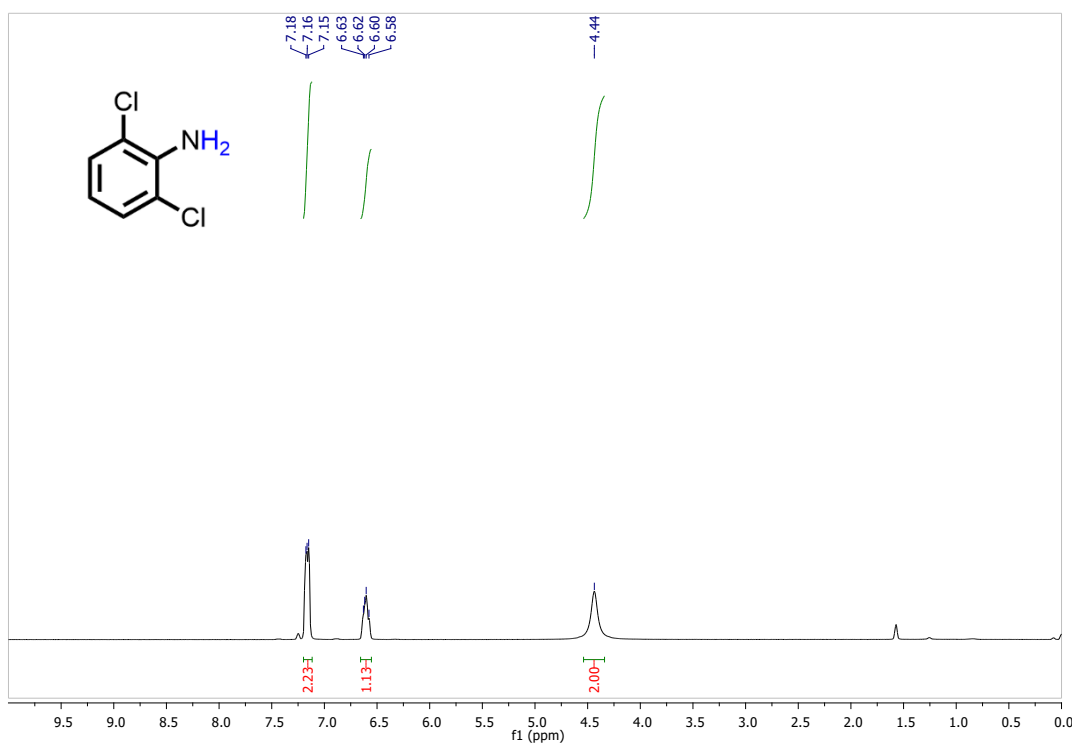

Figure S46.  $^1\text{H}$  NMR Spectrum (300 MHz, 25 °C,  $\text{CDCl}_3$ ) of **5t**.



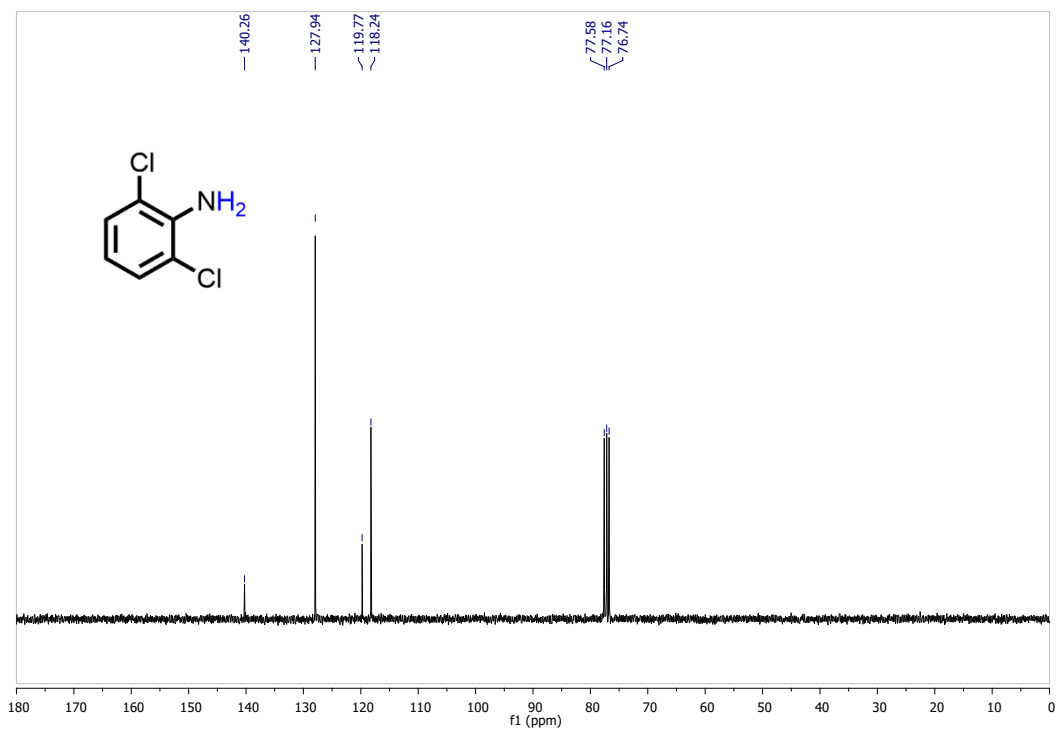

Figure S47.  $^{13}\text{C}\{^1\text{H}\}$  NMR Spectrum (75 MHz, 25 °C,  $\text{CDCl}_3$ ) of **5t**.

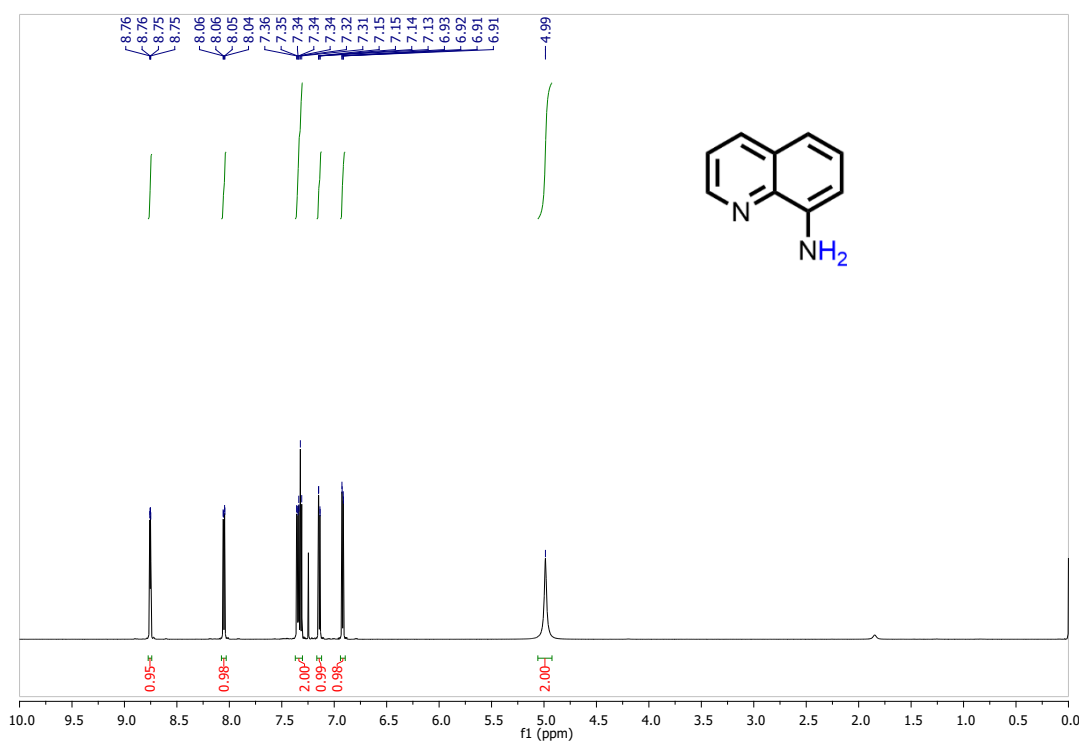

Figure S48.  $^1\text{H}$  NMR Spectrum (400 MHz, 25 °C,  $\text{CDCl}_3$ ) of **5u**.

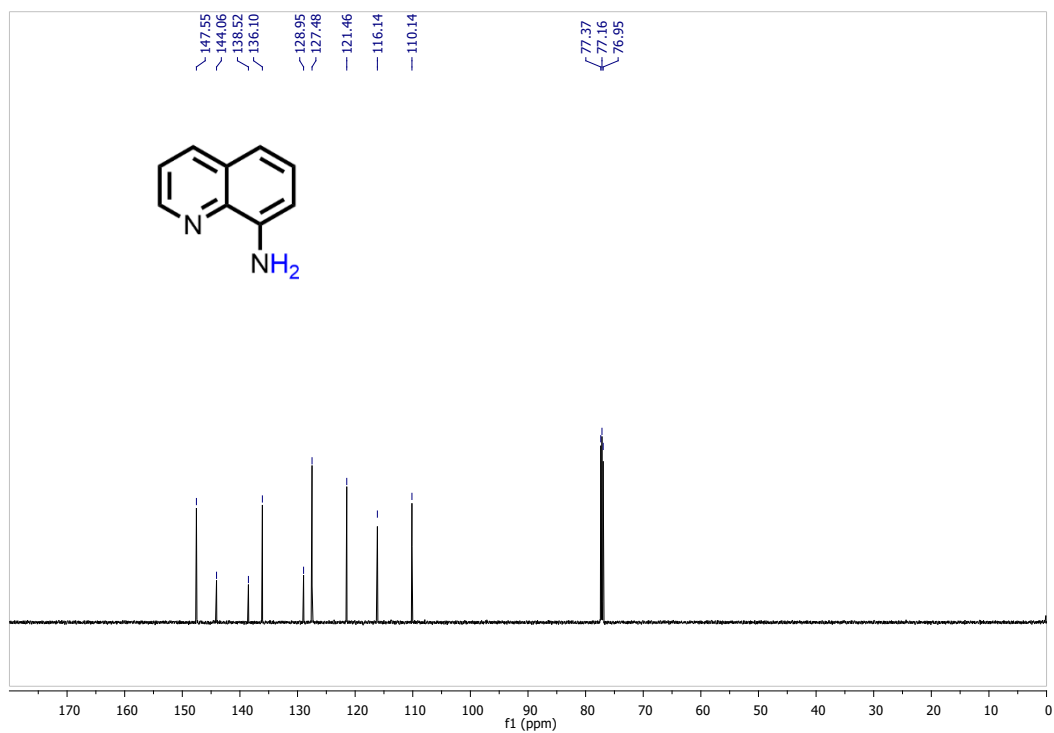

Figure S49.  $^{13}\text{C}\{^1\text{H}\}$  NMR Spectrum (100 MHz, 25 °C,  $\text{CDCl}_3$ ) of **5u**.

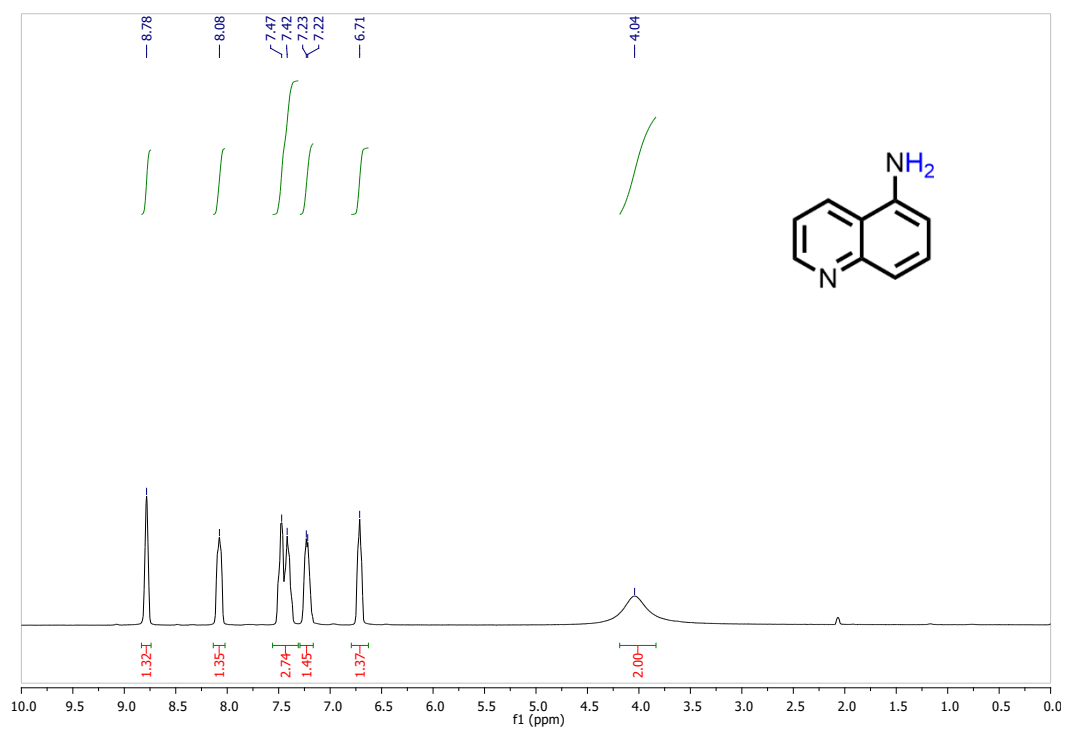

Figure S50.  $^1\text{H}$  NMR Spectrum (300 MHz, 25 °C,  $\text{CDCl}_3$ ) of **5v**.

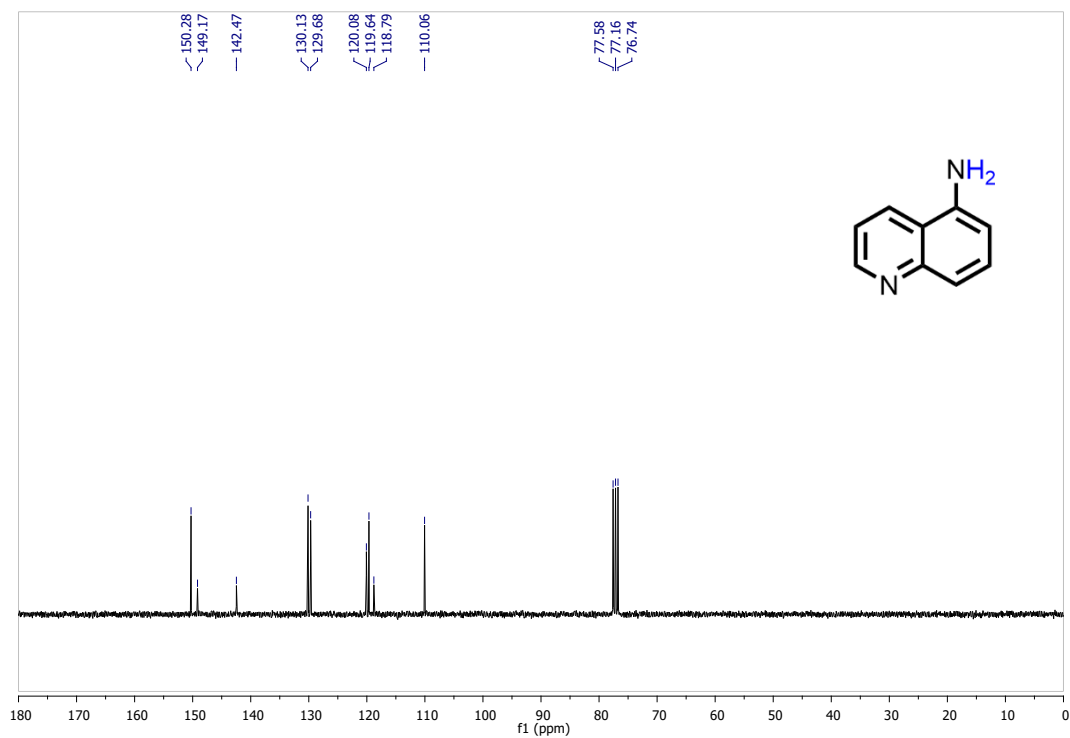

**Figure S51.**  $^{13}\text{C}\{^1\text{H}\}$  NMR Spectrum (75 MHz, 25 °C,  $\text{CDCl}_3$ ) of **5v**.

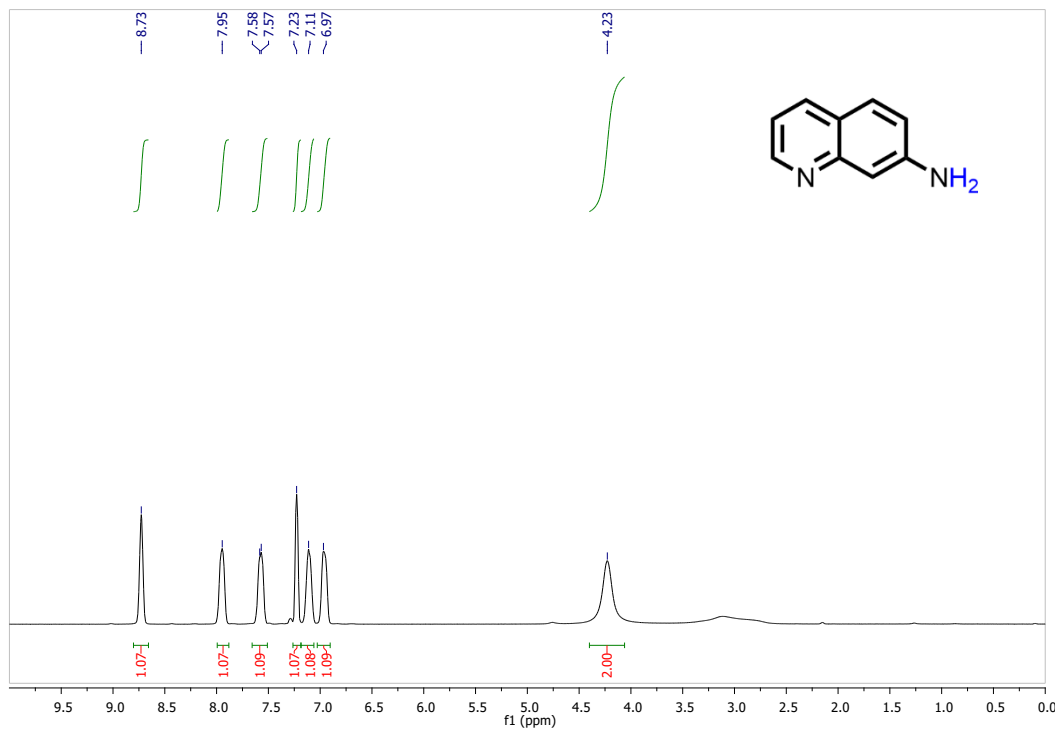

**Figure S52.**  $^1\text{H}$  NMR Spectrum (300 MHz, 25 °C,  $\text{CDCl}_3$ ) of **5w**.

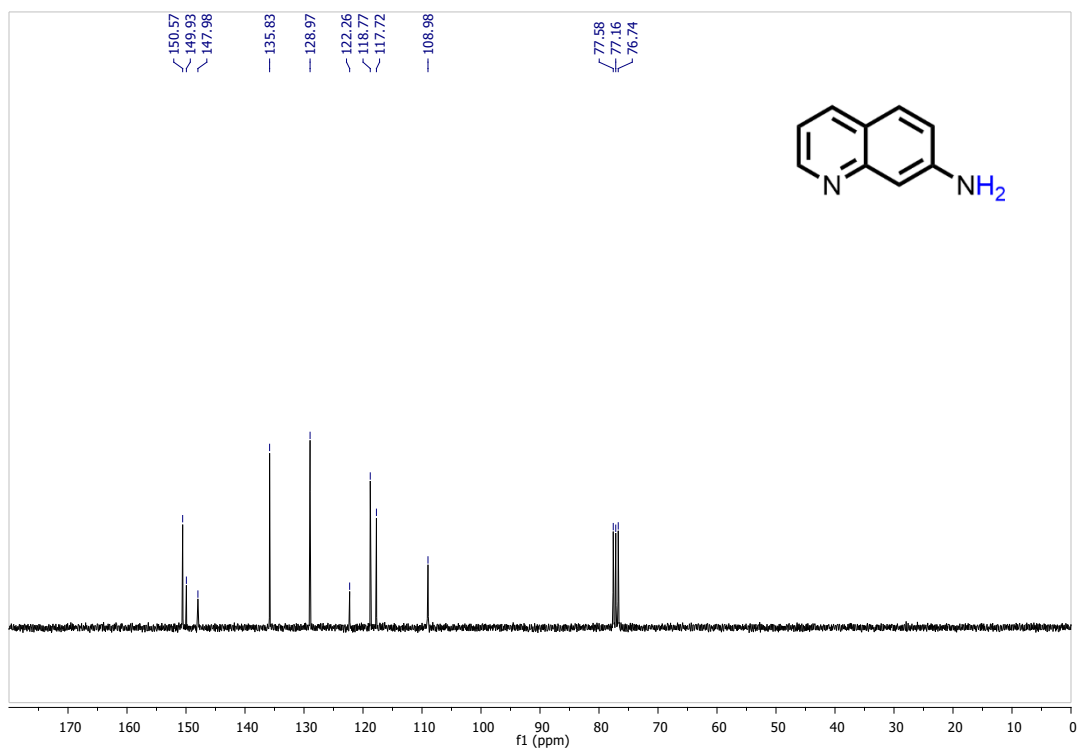

Figure S53.  $^{13}\text{C}\{^1\text{H}\}$  NMR Spectrum (75 MHz, 25 °C,  $\text{CDCl}_3$ ) of 5w.

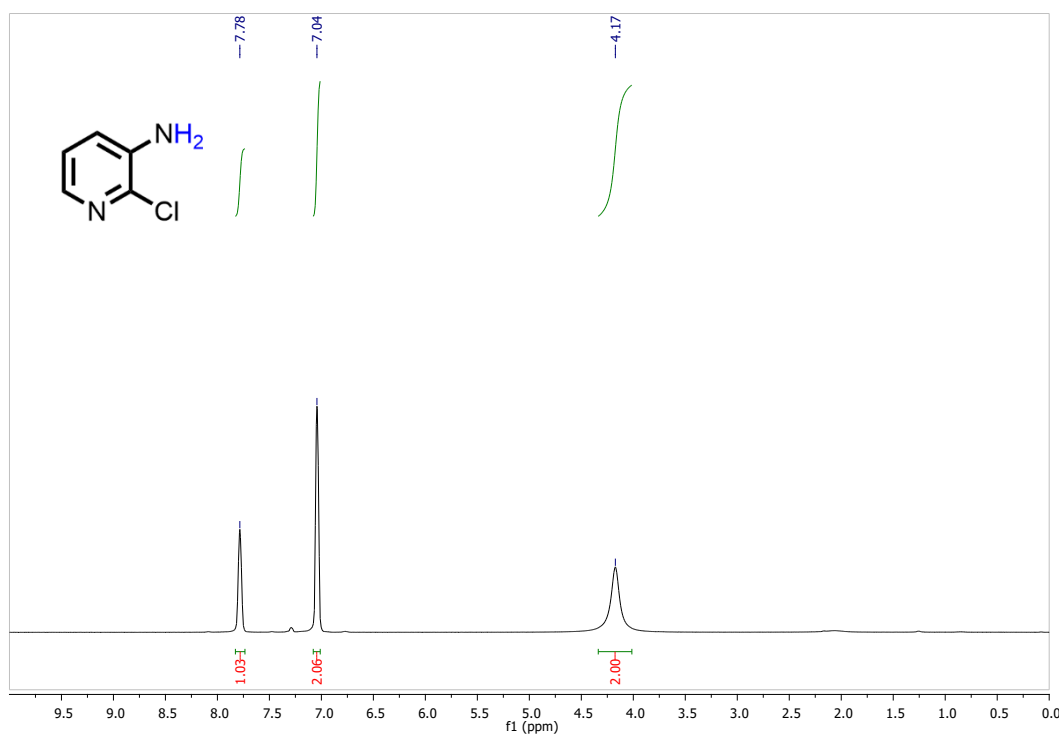

Figure S54.  $^1\text{H}$  NMR Spectrum (300 MHz, 25 °C,  $\text{CDCl}_3$ ) of 5x.

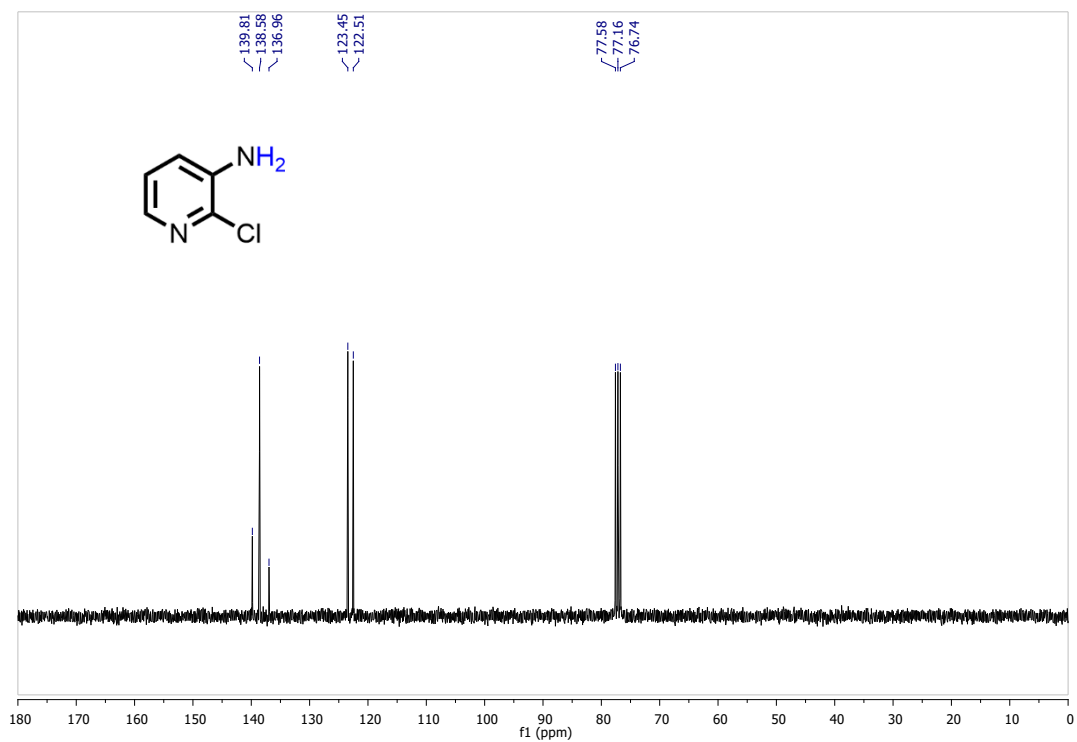

Figure S55.  $^{13}\text{C}\{^1\text{H}\}$  NMR Spectrum (75 MHz, 25 °C,  $\text{CDCl}_3$ ) of **5x**.

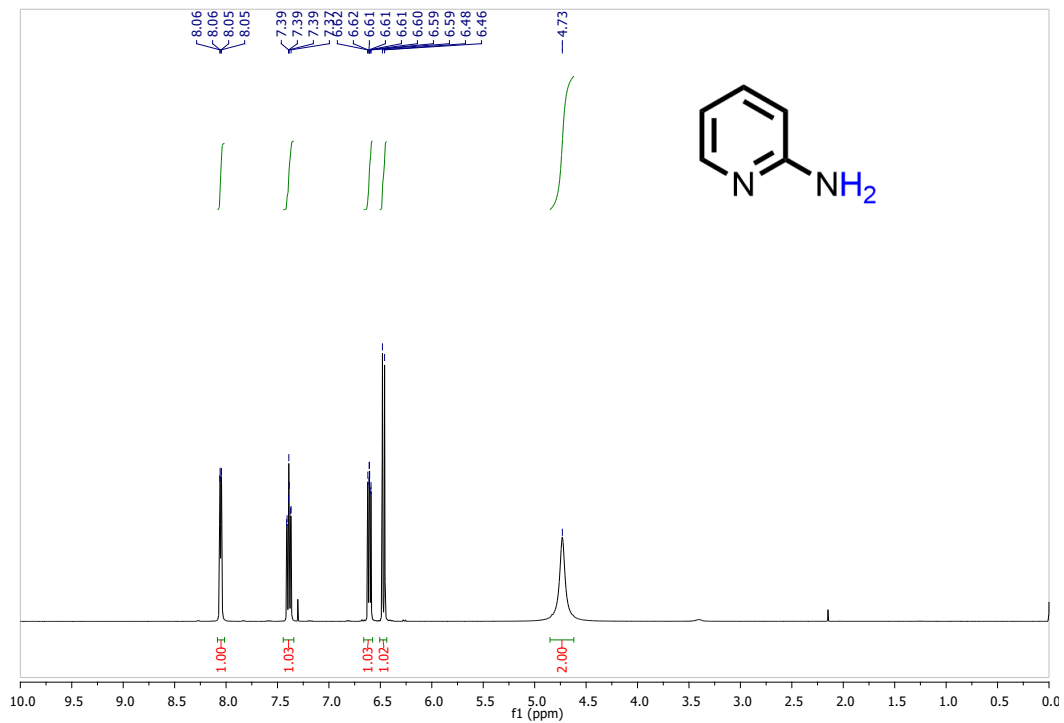

Figure S56.  $^1\text{H}$  NMR Spectrum (400 MHz, 25 °C,  $\text{CDCl}_3$ ) of **5y**.

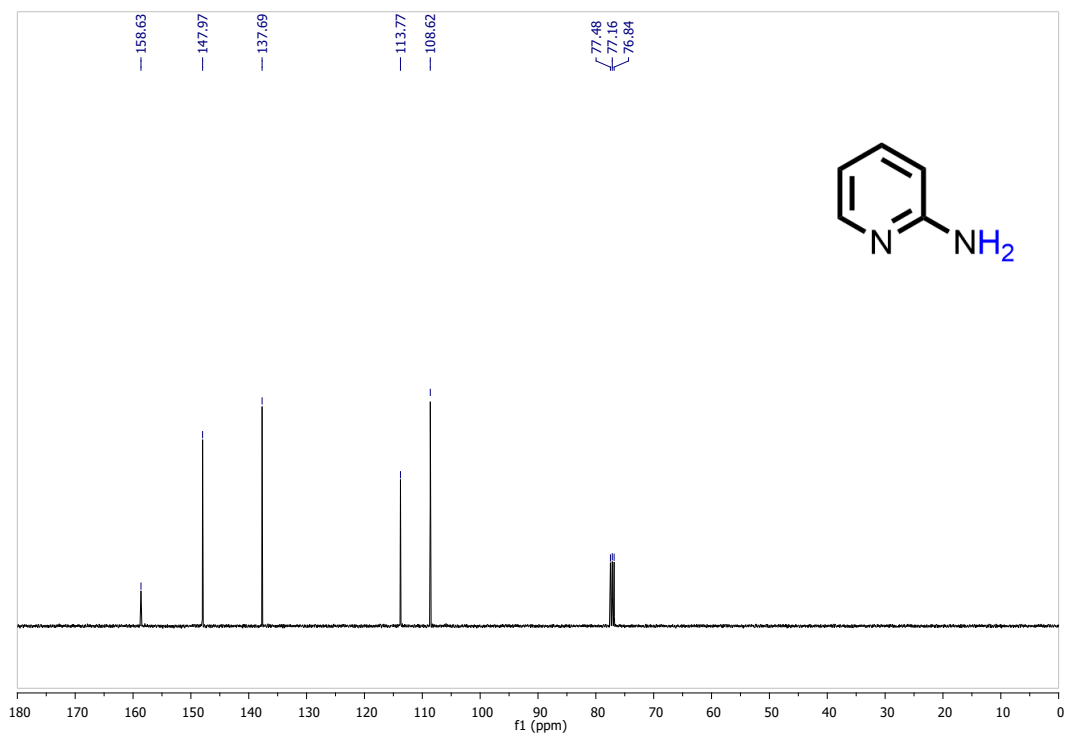

**Figure S57.**  $^{13}\text{C}\{^1\text{H}\}$  NMR Spectrum (100 MHz, 25 °C,  $\text{CDCl}_3$ ) of **5y**.

## 7. Gram scale reactions.

The gram scale reaction was performed under similar conditions where aniline and benzocaine were obtained in good yields.

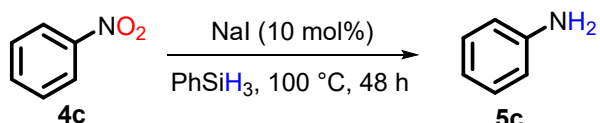

**Conditions**

1. **4c** (5 mmol), catalyst **1** (1 mol%), **5c**: yield 65% (302 mg)
2. **4c** (5 mmol), catalyst **1** (3 mol%), **5c**: yield 82% (381 mg)

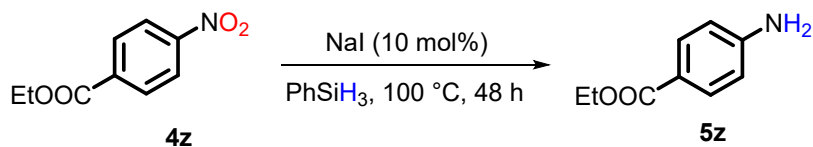

**Conditions**

1. **4z** (5 mmol), catalyst **1** (1 mol%), **5z**: yield 62% (512 mg)
2. **4z** (5 mmol), catalyst **1** (3 mol%), **5z**: yield 74% (610 mg)

## 8. Synthesis of drug molecules 5z-5za and their NMR spectra.

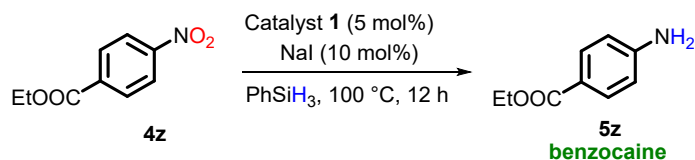

In a 25 mL Schlenk flask, indium metal complex **1** (5 mol%), ethyl-4-nitrobenzoate (0.5 mmol), NaI (10 mol%) and PhSiH<sub>3</sub> (2.0 mmol) were added inside glovebox. Then, toluene (0.5 mL) was added into it and allowed the reaction mixture to stir at 100 °C (preheated) for 12 h. The reaction mixture was allowed to come at room temperature and methanol/water was added into it. The reaction mixture was extracted in DCM and organic layer was separated which was dried over anhydrous Na<sub>2</sub>SO<sub>4</sub>. The solvent was evaporated and the reaction mixture was purified by column chromatography using silica and mixture of hexane and ethyl acetate as an eluent.

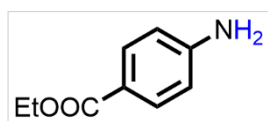

Ethyl-4-aminobenzoate, **5z**.<sup>3</sup> Yield: 78% (64 mg). <sup>1</sup>H NMR (300 MHz, CDCl<sub>3</sub>): δ<sub>H</sub> 7.88 (m, 2H), 6.67 - 6.66 (m, 2H), 4.34 (t, 2H, *J* = 6 Hz), 4.09 (b, 2H), 1.38 (d, 3H, *J* = 6 Hz). <sup>13</sup>C{<sup>1</sup>H} NMR (75 MHz, CDCl<sub>3</sub>)

δ<sub>C</sub> 166.8, 150.9, 131.7, 120.2, 113.9, 60.4, 14.5 ppm.

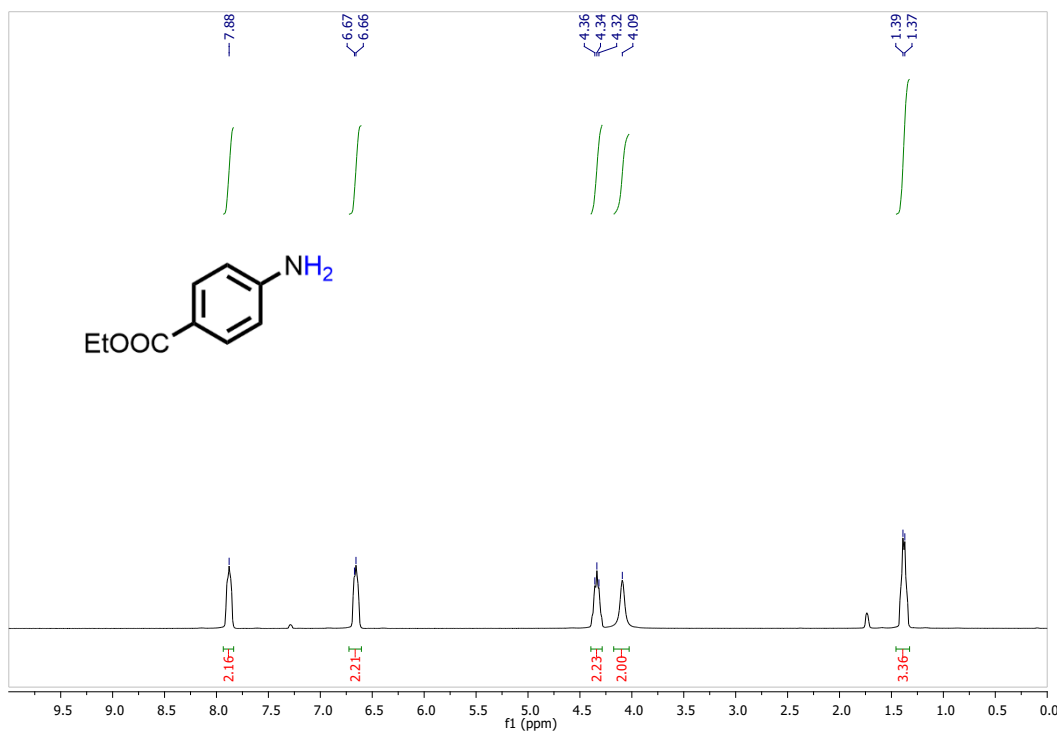

Figure S58.  $^1\text{H}$  NMR Spectrum (300 MHz, 25 °C,  $\text{CDCl}_3$ ) of **5z**.

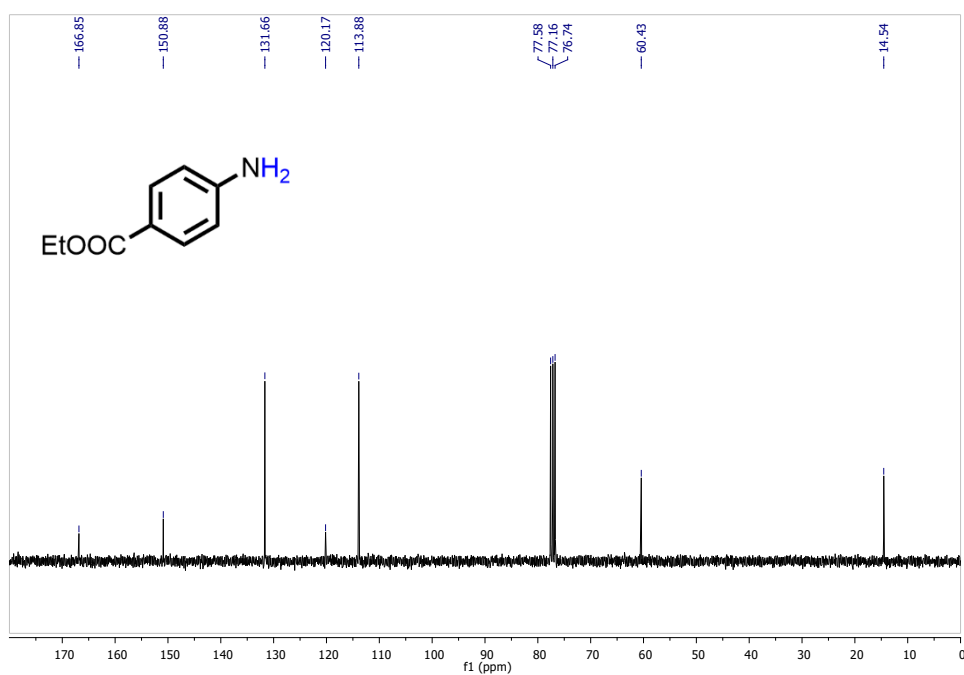

Figure S59.  $^{13}\text{C}\{^1\text{H}\}$  NMR Spectrum (300 MHz, 25 °C,  $\text{CDCl}_3$ ) of **5z**.



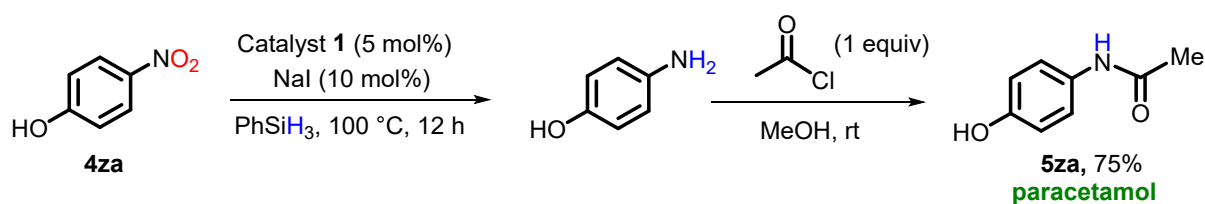

In a 25 mL Schlenk flask, indium metal complex **1** (5 mol%), 4-nitrophenol (0.5 mmol), NaI (10 mol%) and PhSiH<sub>3</sub> (2.0 mmol) were added inside glovebox. Then, toluene (0.5 mL) was added into it and allowed the reaction mixture to stir at 100 °C (preheated) for 12 h. The reaction mixture was allowed to come at room temperature and methanol/water was added into it. The reaction mixture was extracted in DCM and organic layer was separated which was dried over anhydrous Na<sub>2</sub>SO<sub>4</sub>. The solvent was evaporated and the reaction mixture was purified by column chromatography using silica and mixture of hexane and ethyl acetate as an eluent. To a solution of 4-aminophenol (54 mg, 0.5 mmol) in MeOH (5 mL) was added and allowed the reaction mixture to stir at room temperature. Then, acetylchloride (36 μL, 0.5 mmol) in MeOH (5 mL) was added dropwise into the reaction mixture. The reaction mixture was stirred for 3 h and the product was extracted with ethylacetate and dried over anhydrous MgSO<sub>4</sub>. The crude product was isolated by column chromatography using silica and mixture of hexane and ethyl acetate as an eluent.

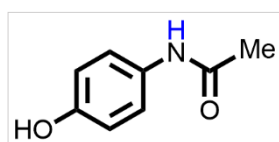

N-(4-hydroxyphenyl)acetamide, **5zz**.<sup>3</sup> Yield: 75% (57 mg). <sup>1</sup>H NMR (400 MHz, DMSO-d<sub>6</sub>): δ<sub>H</sub> 9.67 (b, 1H), 9.20 (b, 1H), 7.35 (d, 2H, *J* = 8 Hz), 6.69 (d, 2H, *J* = 8 Hz), 1.99 (s, 3H). <sup>13</sup>C{<sup>1</sup>H} NMR (100 MHz, DMSO-d<sub>6</sub>) δ<sub>C</sub> 168.1, 153.6, 131.5, 121.3, 115.5, 24.2 ppm.

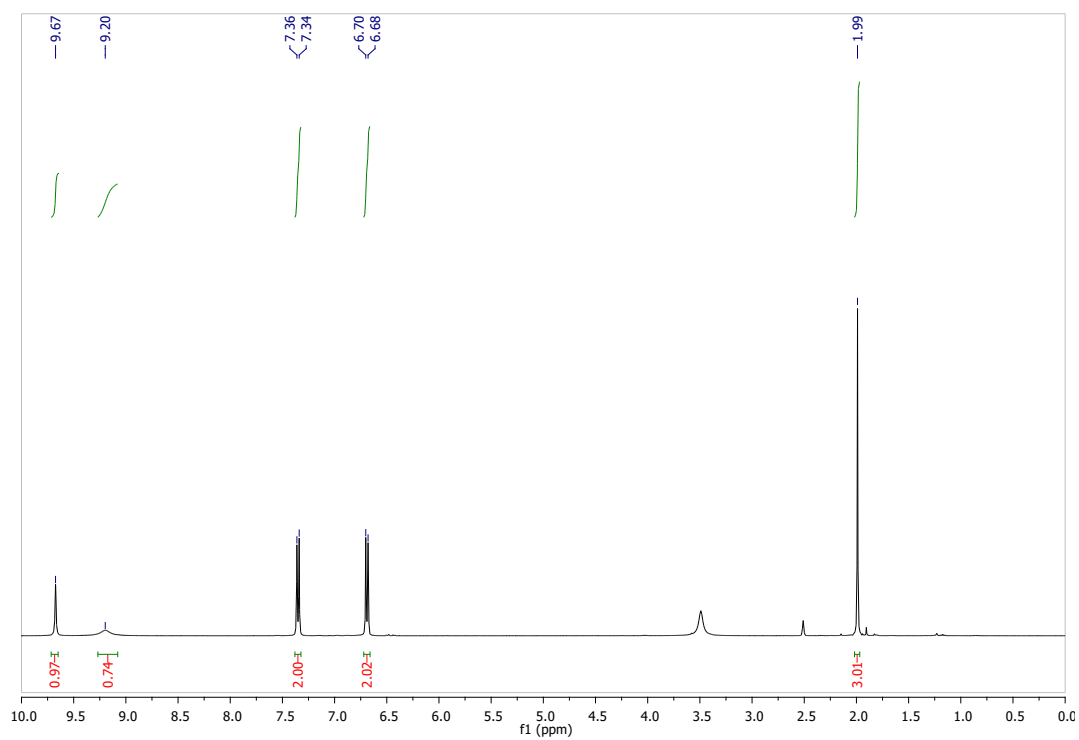

**Figure S60.**  $^1\text{H}$  NMR Spectrum (400 MHz, 25 °C, DMSO- $d_6$ ) of **5za**.

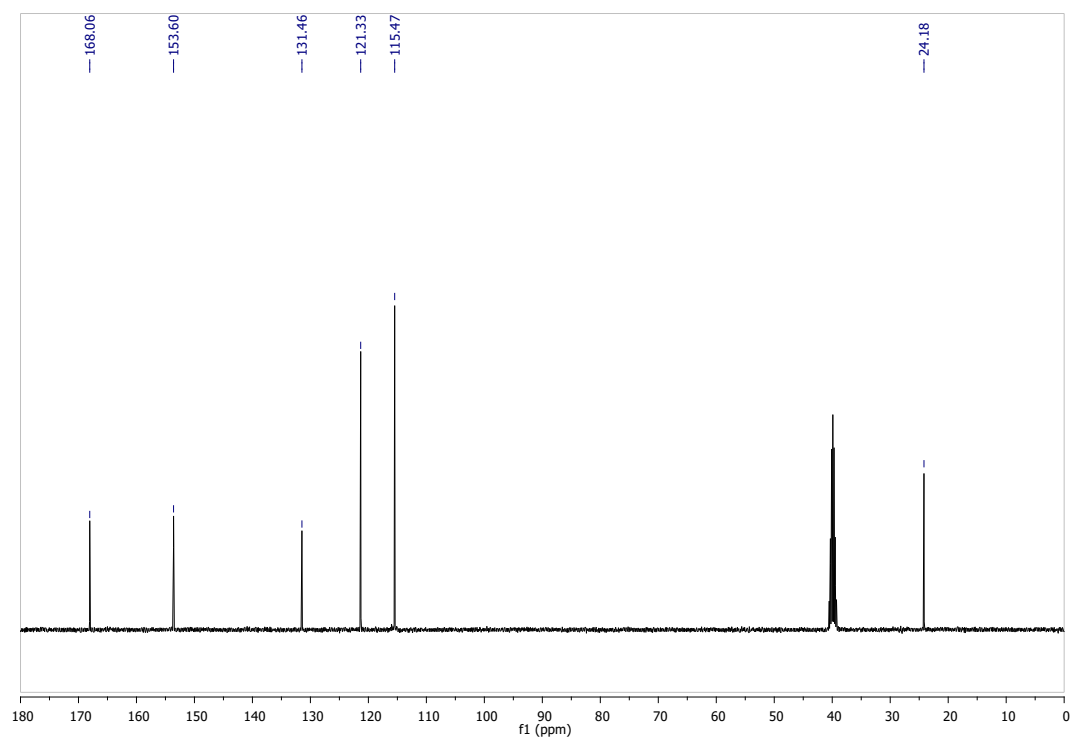

**Figure S61.**  $^{13}\text{C}\{^1\text{H}\}$  NMR Spectrum (300 MHz, 25 °C, DMSO- $d_6$ ) of **5za**.

## 8. References

1. (a) A. Altomare, M. Cascarano, C. Giacovazzo and A. Guagliardi, *J. Appl. Crystallogr.*, 1993, **26**, 343; (b) M. C. Burla, R. Caliandro, M. Camalli, B. Carrozzini, G. L. Cascarano, L. De Caro, C. Giacovazzo, G. Polidori and R. Spagna, *J. Appl. Crystallogr.*, 2005, **38**, 381.
2. G. M. Sheldrick, *Acta Crystallogr., Sect. A: Found. Crystallogr.*, 2008, **64**, 112.
3. (a) R. R. Behera, S. Panda, R. Ghosh, A. A. Kumar and B. Bagh, *Org. Lett.*, 2022, **24**, 9179–9183. (b) G. V. Kumar and S. K. Mandal, *Dalton Trans.*, 2016, **45**, 7421-7426. (c) R. Lopes, M. M. Pereira and B. Royo, *ChemCatChem*, 2017, **15**, 3073-3077. (d) L. Zhao, C. Hu, X. Cong, G. Deng, L. L. Liu, M. Luo, and X. Zeng, *J. Am. Chem. Soc.*, 2021, **143**, 1618-1629.
